# Supplementary material
Source: publisher figshare collection journal article supplement (https://acs.figshare.com/ndownloader/files/5700921)
Supplement: Supplementary file 1 [file 5700921]

  
data_compound 1 
  
_audit_creation_method            SHELXL-97 
_chemical_name_systematic 
; 
 ? 
; 
_chemical_name_common             ? 
_chemical_melting_point           ? 
_chemical_formula_moiety          ? 
_chemical_formula_sum 
 'C18 H25 Cl N6 Ni O4 S2' 
_chemical_formula_weight          547.72 
  
loop_ 
 _atom_type_symbol 
 _atom_type_description 
 _atom_type_scat_dispersion_real 
 _atom_type_scat_dispersion_imag 
 _atom_type_scat_source 
 'C'  'C'   0.0033   0.0016 
 'International Tables Vol C Tables 4.2.6.8 and 6.1.1.4' 
 'H'  'H'   0.0000   0.0000 
 'International Tables Vol C Tables 4.2.6.8 and 6.1.1.4' 
 'N'  'N'   0.0061   0.0033 
 'International Tables Vol C Tables 4.2.6.8 and 6.1.1.4' 
 'O'  'O'   0.0106   0.0060 
 'International Tables Vol C Tables 4.2.6.8 and 6.1.1.4' 
 'S'  'S'   0.1246   0.1234 
 'International Tables Vol C Tables 4.2.6.8 and 6.1.1.4' 
 'Cl'  'Cl'   0.1484   0.1585 
 'International Tables Vol C Tables 4.2.6.8 and 6.1.1.4' 
 'Ni'  'Ni'   0.3393   1.1124 
 'International Tables Vol C Tables 4.2.6.8 and 6.1.1.4' 
  
_symmetry_cell_setting            Triclinic 
_symmetry_space_group_name_H-M    P-1 
  
loop_ 
 _symmetry_equiv_pos_as_xyz 
 'x, y, z' 
 '-x, -y, -z' 
  
_cell_length_a                    8.6381(10) 
_cell_length_b                    9.6750(12) 
_cell_length_c                    15.0295(14) 
_cell_angle_alpha                 106.324(9) 
_cell_angle_beta                  102.031(7) 
_cell_angle_gamma                 98.174(11) 
_cell_volume                      1151.7(2) 
_cell_formula_units_Z             2 
_cell_measurement_temperature     293(2) 
_cell_measurement_reflns_used     93 
_cell_measurement_theta_min       2.20 
_cell_measurement_theta_max       13.59 
  
_exptl_crystal_description        irregular_plate 
_exptl_crystal_colour             brown 
_exptl_crystal_size_max           0.23 
_exptl_crystal_size_mid           0.85 
_exptl_crystal_size_min           0.35 
_exptl_crystal_density_meas       ? 
_exptl_crystal_density_diffrn     1.579 
_exptl_crystal_density_method     'not measured' 
_exptl_crystal_F_000              568 
_exptl_absorpt_coefficient_mu     1.178 
_exptl_absorpt_correction_type    SHELXA 
_exptl_absorpt_correction_T_min   0.6663 
_exptl_absorpt_correction_T_max   0.9035 
_exptl_absorpt_process_details    ? 
  
_exptl_special_details 
; 
 ? 
; 
  
_diffrn_ambient_temperature       293(2) 
_diffrn_radiation_wavelength      0.71073 
_diffrn_radiation_type            MoK\a 
_diffrn_radiation_source          'fine-focus sealed tube' 
_diffrn_radiation_monochromator   graphite 
_diffrn_measurement_device_type   'Bruker P4' 
_diffrn_measurement_method        '2\q/\w scans' 
_diffrn_detector_area_resol_mean  ? 
_diffrn_standards_number          3 
_diffrn_standards_interval_count  97 
_diffrn_standards_interval_time   ? 
_diffrn_standards_decay_%         ? 
_diffrn_reflns_number             5538 
_diffrn_reflns_av_R_equivalents   0.0174 
_diffrn_reflns_av_sigmaI/netI     0.0360 
_diffrn_reflns_limit_h_min        0 
_diffrn_reflns_limit_h_max        11 
_diffrn_reflns_limit_k_min        -11 
_diffrn_reflns_limit_k_max        11 
_diffrn_reflns_limit_l_min        -19 
_diffrn_reflns_limit_l_max        19 
_diffrn_reflns_theta_min          2.25 
_diffrn_reflns_theta_max          27.50 
_reflns_number_total              5196 
_reflns_number_gt                 4192 
_reflns_threshold_expression      >2sigma(I) 
  
_computing_data_collection        'Bruker XSCANS' 
_computing_cell_refinement        'Bruker XSCANS' 
_computing_data_reduction         'Bruker SHELXTL' 
_computing_structure_solution     'SHELXS-97 (Sheldrick, 1990)' 
_computing_structure_refinement   'SHELXL-97 (Sheldrick, 1997)' 
_computing_molecular_graphics     'Bruker SHELXTL' 
_computing_publication_material   'Bruker SHELXTL' 
  
_refine_special_details 
; 
 Refinement of F^2^ against ALL reflections.  The weighted R-factor wR and 
 goodness of fit S are based on F^2^, conventional R-factors R are based 
 on F, with F set to zero for negative F^2^. The threshold expression of 
 F^2^ > 2sigma(F^2^) is used only for calculating R-factors(gt) etc. and is 
 not relevant to the choice of reflections for refinement.  R-factors based 
 on F^2^ are statistically about twice as large as those based on F, and R- 
 factors based on ALL data will be even larger. 
; 
  
_refine_ls_structure_factor_coef  Fsqd 
_refine_ls_matrix_type            full 
_refine_ls_weighting_scheme       calc 
_refine_ls_weighting_details 
 'calc w=1/[\s^2^(Fo^2^)+(0.0465P)^2^+0.5842P] where P=(Fo^2^+2Fc^2^)/3' 
_atom_sites_solution_primary      direct 
_atom_sites_solution_secondary    difmap 
_atom_sites_solution_hydrogens    geom 
_refine_ls_hydrogen_treatment     mixed 
_refine_ls_extinction_method      SHELXL 
_refine_ls_extinction_coef        0.0059(12) 
_refine_ls_extinction_expression 
 'Fc^*^=kFc[1+0.001xFc^2^\l^3^/sin(2\q)]^-1/4^' 
_refine_ls_number_reflns          5196 
_refine_ls_number_parameters      321 
_refine_ls_number_restraints      19 
_refine_ls_R_factor_all           0.0536 
_refine_ls_R_factor_gt            0.0401 
_refine_ls_wR_factor_ref          0.1038 
_refine_ls_wR_factor_gt           0.0968 
_refine_ls_goodness_of_fit_ref    1.023 
_refine_ls_restrained_S_all       1.049 
_refine_ls_shift/su_max           0.057 
_refine_ls_shift/su_mean          0.003 
  
loop_ 
 _atom_site_label 
 _atom_site_type_symbol 
 _atom_site_fract_x 
 _atom_site_fract_y 
 _atom_site_fract_z 
 _atom_site_U_iso_or_equiv 
 _atom_site_adp_type 
 _atom_site_occupancy 
 _atom_site_symmetry_multiplicity 
 _atom_site_calc_flag 
 _atom_site_refinement_flags 
 _atom_site_disorder_assembly 
 _atom_site_disorder_group 
Ni Ni 1.05799(4) 0.49854(3) 0.30386(2) 0.03646(10) Uani 1 1 d . . . 
Cl Cl 0.59142(9) 0.84100(9) 0.20115(6) 0.0600(2) Uani 1 1 d D . . 
S1 S 1.07122(9) 0.35990(7) 0.39170(5) 0.04687(17) Uani 1 1 d . . . 
S2 S 1.25372(11) 0.34941(9) 0.58066(5) 0.0600(2) Uani 1 1 d . . . 
O1 O 0.4635(3) 0.9098(3) 0.1805(2) 0.1010(10) Uani 1 1 d D A . 
O2 O 0.6656(6) 0.8261(6) 0.1245(3) 0.083(2) Uani 0.551(9) 1 d PD A 1 
O3 O 0.7086(6) 0.9290(7) 0.2836(3) 0.113(3) Uani 0.551(9) 1 d PD A 1 
O4 O 0.5405(6) 0.7038(5) 0.2054(6) 0.139(4) Uani 0.551(9) 1 d PD A 1 
O2A O 0.6093(12) 0.7483(12) 0.1175(4) 0.312(12) Uani 0.449(9) 1 d PD A 2 
O3A O 0.7340(6) 0.9401(8) 0.2530(7) 0.180(7) Uani 0.449(9) 1 d PD A 2 
O4A O 0.5497(9) 0.7555(10) 0.2576(7) 0.232(8) Uani 0.449(9) 1 d PD A 2 
N1 N 1.2061(3) 0.6645(2) 0.38883(15) 0.0393(5) Uani 1 1 d . . . 
N2 N 1.0342(3) 0.6068(2) 0.20961(15) 0.0389(5) Uani 1 1 d . . . 
N3 N 0.8921(3) 0.3513(3) 0.20825(16) 0.0453(5) Uani 1 1 d . . . 
N4 N 0.8165(3) 0.4012(3) 0.13852(16) 0.0479(6) Uani 1 1 d . . . 
N5 N 1.1807(3) 0.4378(3) 0.12284(15) 0.0459(5) Uani 1 1 d . . . 
N6 N 1.0852(3) 0.3299(3) 0.04479(17) 0.0554(6) Uani 1 1 d . . . 
C1 C 1.1257(5) 0.1714(4) 0.5218(2) 0.0681(9) Uani 1 1 d . . . 
H1A H 1.1428 0.1108 0.5622 0.102 Uiso 1 1 calc R . . 
H1B H 1.1507 0.1272 0.4623 0.102 Uiso 1 1 calc R . . 
H1C H 1.0146 0.1803 0.5092 0.102 Uiso 1 1 calc R . . 
C2 C 1.2172(3) 0.4452(3) 0.49743(18) 0.0425(6) Uani 1 1 d . . . 
C3 C 1.3096(3) 0.5829(3) 0.52522(18) 0.0426(6) Uani 1 1 d . . . 
C4 C 1.4351(4) 0.6530(4) 0.6214(2) 0.0609(8) Uani 1 1 d . . . 
H4A H 1.3831 0.6716 0.6737 0.073 Uiso 1 1 calc R . . 
H4B H 1.5097 0.5893 0.6312 0.073 Uiso 1 1 calc R . . 
C5 C 1.5236(4) 0.7968(4) 0.6162(2) 0.0677(9) Uani 1 1 d . . . 
H5A H 1.5378 0.8761 0.6756 0.081 Uiso 1 1 calc R . . 
H5B H 1.6295 0.7876 0.6062 0.081 Uiso 1 1 calc R . . 
C6 C 1.4203(4) 0.8288(3) 0.5325(2) 0.0544(7) Uani 1 1 d . . . 
H6A H 1.3635 0.9056 0.5554 0.065 Uiso 1 1 calc R . . 
H6B H 1.4870 0.8603 0.4943 0.065 Uiso 1 1 calc R . . 
C7 C 1.3015(3) 0.6853(3) 0.47407(18) 0.0400(6) Uani 1 1 d . . . 
C8 C 1.2187(4) 0.7898(3) 0.3508(2) 0.0482(7) Uani 1 1 d . . . 
H8A H 1.3137 0.7970 0.3260 0.058 Uiso 1 1 calc R . . 
H8B H 1.2298 0.8811 0.4018 0.058 Uiso 1 1 calc R . . 
C9 C 1.0674(3) 0.7657(3) 0.27115(19) 0.0440(6) Uani 1 1 d . . . 
H9A H 0.9776 0.7783 0.3010 0.053 Uiso 1 1 calc R . . 
C10 C 1.0800(4) 0.8778(3) 0.2174(2) 0.0562(7) Uani 1 1 d . . . 
H10A H 1.0906 0.9749 0.2608 0.084 Uiso 1 1 calc R . . 
H10B H 0.9841 0.8544 0.1657 0.084 Uiso 1 1 calc R . . 
H10C H 1.1731 0.8744 0.1921 0.084 Uiso 1 1 calc R . . 
C11 C 0.8627(3) 0.5568(3) 0.1522(2) 0.0492(7) Uani 1 1 d . . . 
H11A H 0.7943 0.6106 0.1860 0.059 Uiso 1 1 calc R . . 
H11B H 0.8515 0.5735 0.0907 0.059 Uiso 1 1 calc R . . 
C12 C 0.7036(4) 0.2924(4) 0.0709(3) 0.0686(9) Uani 1 1 d . . . 
H12A H 0.6360 0.3002 0.0164 0.082 Uiso 1 1 calc R . . 
C13 C 0.7058(4) 0.1681(4) 0.0962(3) 0.0749(11) Uani 1 1 d . . . 
H13A H 0.6408 0.0749 0.0626 0.090 Uiso 1 1 calc R . . 
C14 C 0.8240(4) 0.2085(3) 0.1817(2) 0.0602(8) Uani 1 1 d . . . 
H14A H 0.8520 0.1452 0.2159 0.072 Uiso 1 1 calc R . . 
C15 C 1.1503(3) 0.5840(3) 0.14729(19) 0.0451(6) Uani 1 1 d . . . 
H15A H 1.1067 0.6046 0.0886 0.054 Uiso 1 1 calc R . . 
H15B H 1.2523 0.6540 0.1806 0.054 Uiso 1 1 calc R . . 
C16 C 1.2969(4) 0.3888(4) 0.1734(2) 0.0652(9) Uani 1 1 d . . . 
H16A H 1.3762 0.4445 0.2292 0.078 Uiso 1 1 calc R . . 
C17 C 1.2752(5) 0.2435(5) 0.1270(3) 0.0803(11) Uani 1 1 d . . . 
H17A H 1.3356 0.1784 0.1442 0.096 Uiso 1 1 calc R . . 
C18 C 1.1447(5) 0.2119(4) 0.0486(3) 0.0702(10) Uani 1 1 d . . . 
H18A H 1.1031 0.1186 0.0035 0.084 Uiso 1 1 calc R . . 
  
loop_ 
 _atom_site_aniso_label 
 _atom_site_aniso_U_11 
 _atom_site_aniso_U_22 
 _atom_site_aniso_U_33 
 _atom_site_aniso_U_23 
 _atom_site_aniso_U_13 
 _atom_site_aniso_U_12 
Ni 0.03894(18) 0.03799(17) 0.03091(16) 0.01271(12) 0.00430(12) 0.00719(13) 
Cl 0.0480(4) 0.0731(5) 0.0664(5) 0.0290(4) 0.0159(3) 0.0218(4) 
S1 0.0560(4) 0.0431(3) 0.0401(3) 0.0185(3) 0.0051(3) 0.0069(3) 
S2 0.0835(6) 0.0637(5) 0.0427(4) 0.0298(3) 0.0140(4) 0.0247(4) 
O1 0.0675(17) 0.109(2) 0.129(3) 0.034(2) 0.0143(17) 0.0502(16) 
O2 0.085(4) 0.105(4) 0.084(4) 0.040(3) 0.054(3) 0.035(3) 
O3 0.112(6) 0.155(7) 0.047(3) 0.021(4) -0.010(3) 0.021(5) 
O4 0.075(4) 0.096(4) 0.298(12) 0.124(6) 0.073(6) 0.025(3) 
O2A 0.368(19) 0.44(2) 0.092(8) -0.041(11) -0.033(10) 0.355(18) 
O3A 0.037(4) 0.200(11) 0.325(19) 0.183(12) -0.003(6) -0.028(5) 
O4A 0.105(8) 0.403(18) 0.240(12) 0.282(13) -0.035(8) -0.032(10) 
N1 0.0443(12) 0.0365(11) 0.0361(11) 0.0127(9) 0.0058(9) 0.0104(9) 
N2 0.0370(11) 0.0448(11) 0.0353(10) 0.0155(9) 0.0059(8) 0.0096(9) 
N3 0.0422(12) 0.0490(13) 0.0407(12) 0.0159(10) 0.0027(9) 0.0055(10) 
N4 0.0372(12) 0.0595(14) 0.0419(12) 0.0192(11) -0.0010(9) 0.0048(10) 
N5 0.0474(13) 0.0572(13) 0.0370(11) 0.0177(10) 0.0095(10) 0.0202(11) 
N6 0.0686(16) 0.0561(14) 0.0419(13) 0.0167(11) 0.0099(11) 0.0195(12) 
C1 0.102(3) 0.0608(19) 0.0612(19) 0.0360(16) 0.0338(19) 0.0276(18) 
C2 0.0520(15) 0.0485(14) 0.0332(12) 0.0173(11) 0.0130(11) 0.0193(12) 
C3 0.0472(14) 0.0489(14) 0.0303(12) 0.0116(10) 0.0049(10) 0.0162(12) 
C4 0.065(2) 0.072(2) 0.0350(14) 0.0140(14) -0.0031(13) 0.0123(16) 
C5 0.068(2) 0.064(2) 0.0506(18) 0.0061(15) -0.0093(15) 0.0124(17) 
C6 0.0555(17) 0.0461(15) 0.0470(16) 0.0043(12) -0.0010(13) 0.0082(13) 
C7 0.0416(13) 0.0406(13) 0.0333(12) 0.0062(10) 0.0060(10) 0.0119(11) 
C8 0.0585(17) 0.0377(13) 0.0426(14) 0.0137(11) 0.0026(12) 0.0066(12) 
C9 0.0490(15) 0.0421(14) 0.0437(14) 0.0164(11) 0.0103(12) 0.0161(12) 
C10 0.0610(18) 0.0537(16) 0.0632(18) 0.0323(14) 0.0122(15) 0.0194(14) 
C11 0.0404(14) 0.0634(17) 0.0476(15) 0.0289(13) 0.0032(12) 0.0128(13) 
C12 0.0454(17) 0.082(2) 0.060(2) 0.0191(18) -0.0099(15) -0.0027(16) 
C13 0.058(2) 0.065(2) 0.072(2) 0.0114(18) -0.0117(17) -0.0145(17) 
C14 0.0568(18) 0.0501(17) 0.0621(19) 0.0174(14) 0.0013(15) -0.0023(14) 
C15 0.0461(14) 0.0526(15) 0.0395(13) 0.0184(11) 0.0117(11) 0.0111(12) 
C16 0.063(2) 0.087(2) 0.0552(18) 0.0317(17) 0.0084(15) 0.0393(18) 
C17 0.102(3) 0.097(3) 0.074(2) 0.048(2) 0.035(2) 0.065(2) 
C18 0.099(3) 0.062(2) 0.063(2) 0.0261(16) 0.031(2) 0.0311(19) 
  
_geom_special_details 
; 
 All esds (except the esd in the dihedral angle between two l.s. planes) 
 are estimated using the full covariance matrix.  The cell esds are taken 
 into account individually in the estimation of esds in distances, angles 
 and torsion angles; correlations between esds in cell parameters are only 
 used when they are defined by crystal symmetry.  An approximate (isotropic) 
 treatment of cell esds is used for estimating esds involving l.s. planes. 
; 
  
loop_ 
 _geom_bond_atom_site_label_1 
 _geom_bond_atom_site_label_2 
 _geom_bond_distance 
 _geom_bond_site_symmetry_2 
 _geom_bond_publ_flag 
Ni N1 1.852(2) . ? 
Ni N3 1.886(2) . ? 
Ni N2 1.980(2) . ? 
Ni S1 2.1287(8) . ? 
Cl O4 1.361(3) . ? 
Cl O3A 1.374(4) . ? 
Cl O2A 1.376(4) . ? 
Cl O3 1.387(3) . ? 
Cl O1 1.393(2) . ? 
Cl O4A 1.404(4) . ? 
Cl O2 1.414(3) . ? 
S1 C2 1.711(3) . ? 
S2 C2 1.759(3) . ? 
S2 C1 1.779(4) . ? 
N1 C7 1.315(3) . ? 
N1 C8 1.479(3) . ? 
N2 C11 1.484(3) . ? 
N2 C9 1.506(3) . ? 
N2 C15 1.507(3) . ? 
N3 C14 1.333(4) . ? 
N3 N4 1.359(3) . ? 
N4 C12 1.336(4) . ? 
N4 C11 1.446(4) . ? 
N5 N6 1.345(3) . ? 
N5 C16 1.353(4) . ? 
N5 C15 1.434(3) . ? 
N6 C18 1.328(4) . ? 
C1 H1A 0.9600 . ? 
C1 H1B 0.9600 . ? 
C1 H1C 0.9600 . ? 
C2 C3 1.354(4) . ? 
C3 C7 1.415(4) . ? 
C3 C4 1.521(4) . ? 
C4 C5 1.520(5) . ? 
C4 H4A 0.9700 . ? 
C4 H4B 0.9700 . ? 
C5 C6 1.518(4) . ? 
C5 H5A 0.9700 . ? 
C5 H5B 0.9700 . ? 
C6 C7 1.512(4) . ? 
C6 H6A 0.9700 . ? 
C6 H6B 0.9700 . ? 
C8 C9 1.517(4) . ? 
C8 H8A 0.9700 . ? 
C8 H8B 0.9700 . ? 
C9 C10 1.527(4) . ? 
C9 H9A 0.9800 . ? 
C10 H10A 0.9600 . ? 
C10 H10B 0.9600 . ? 
C10 H10C 0.9600 . ? 
C11 H11A 0.9700 . ? 
C11 H11B 0.9700 . ? 
C12 C13 1.361(5) . ? 
C12 H12A 0.9300 . ? 
C13 C14 1.380(5) . ? 
C13 H13A 0.9300 . ? 
C14 H14A 0.9300 . ? 
C15 H15A 0.9700 . ? 
C15 H15B 0.9700 . ? 
C16 C17 1.349(5) . ? 
C16 H16A 0.9300 . ? 
C17 C18 1.378(5) . ? 
C17 H17A 0.9300 . ? 
C18 H18A 0.9300 . ? 
  
loop_ 
 _geom_angle_atom_site_label_1 
 _geom_angle_atom_site_label_2 
 _geom_angle_atom_site_label_3 
 _geom_angle 
 _geom_angle_site_symmetry_1 
 _geom_angle_site_symmetry_3 
 _geom_angle_publ_flag 
N1 Ni N3 170.54(9) . . ? 
N1 Ni N2 87.47(9) . . ? 
N3 Ni N2 84.13(9) . . ? 
N1 Ni S1 98.77(7) . . ? 
N3 Ni S1 89.79(7) . . ? 
N2 Ni S1 173.47(6) . . ? 
O4 Cl O3A 127.7(5) . . ? 
O4 Cl O2A 76.2(6) . . ? 
O3A Cl O2A 111.1(4) . . ? 
O4 Cl O3 111.9(3) . . ? 
O3A Cl O3 24.2(5) . . ? 
O2A Cl O3 129.6(5) . . ? 
O4 Cl O1 112.5(2) . . ? 
O3A Cl O1 112.5(3) . . ? 
O2A Cl O1 110.0(3) . . ? 
O3 Cl O1 111.4(3) . . ? 
O4 Cl O4A 32.9(5) . . ? 
O3A Cl O4A 107.8(3) . . ? 
O2A Cl O4A 108.4(4) . . ? 
O3 Cl O4A 85.8(5) . . ? 
O1 Cl O4A 106.9(3) . . ? 
O4 Cl O2 107.9(3) . . ? 
O3A Cl O2 83.4(5) . . ? 
O2A Cl O2 33.4(6) . . ? 
O3 Cl O2 106.4(3) . . ? 
O1 Cl O2 106.2(2) . . ? 
O4A Cl O2 137.1(5) . . ? 
C2 S1 Ni 110.41(10) . . ? 
C2 S2 C1 104.69(15) . . ? 
C7 N1 C8 116.9(2) . . ? 
C7 N1 Ni 130.39(18) . . ? 
C8 N1 Ni 112.71(16) . . ? 
C11 N2 C9 110.6(2) . . ? 
C11 N2 C15 112.0(2) . . ? 
C9 N2 C15 110.7(2) . . ? 
C11 N2 Ni 106.10(16) . . ? 
C9 N2 Ni 103.74(15) . . ? 
C15 N2 Ni 113.25(16) . . ? 
C14 N3 N4 105.6(2) . . ? 
C14 N3 Ni 141.6(2) . . ? 
N4 N3 Ni 112.67(17) . . ? 
C12 N4 N3 110.7(3) . . ? 
C12 N4 C11 132.2(3) . . ? 
N3 N4 C11 117.0(2) . . ? 
N6 N5 C16 112.2(3) . . ? 
N6 N5 C15 120.9(2) . . ? 
C16 N5 C15 126.8(3) . . ? 
C18 N6 N5 103.6(3) . . ? 
S2 C1 H1A 109.5 . . ? 
S2 C1 H1B 109.5 . . ? 
H1A C1 H1B 109.5 . . ? 
S2 C1 H1C 109.5 . . ? 
H1A C1 H1C 109.5 . . ? 
H1B C1 H1C 109.5 . . ? 
C3 C2 S1 126.3(2) . . ? 
C3 C2 S2 115.1(2) . . ? 
S1 C2 S2 118.60(16) . . ? 
C2 C3 C7 126.9(2) . . ? 
C2 C3 C4 123.4(3) . . ? 
C7 C3 C4 109.6(2) . . ? 
C5 C4 C3 105.3(3) . . ? 
C5 C4 H4A 110.7 . . ? 
C3 C4 H4A 110.7 . . ? 
C5 C4 H4B 110.7 . . ? 
C3 C4 H4B 110.7 . . ? 
H4A C4 H4B 108.8 . . ? 
C6 C5 C4 107.0(3) . . ? 
C6 C5 H5A 110.3 . . ? 
C4 C5 H5A 110.3 . . ? 
C6 C5 H5B 110.3 . . ? 
C4 C5 H5B 110.3 . . ? 
H5A C5 H5B 108.6 . . ? 
C7 C6 C5 105.5(3) . . ? 
C7 C6 H6A 110.6 . . ? 
C5 C6 H6A 110.6 . . ? 
C7 C6 H6B 110.6 . . ? 
C5 C6 H6B 110.6 . . ? 
H6A C6 H6B 108.8 . . ? 
N1 C7 C3 127.0(2) . . ? 
N1 C7 C6 123.1(2) . . ? 
C3 C7 C6 110.0(2) . . ? 
N1 C8 C9 109.0(2) . . ? 
N1 C8 H8A 109.9 . . ? 
C9 C8 H8A 109.9 . . ? 
N1 C8 H8B 109.9 . . ? 
C9 C8 H8B 109.9 . . ? 
H8A C8 H8B 108.3 . . ? 
N2 C9 C8 106.4(2) . . ? 
N2 C9 C10 115.2(2) . . ? 
C8 C9 C10 112.8(2) . . ? 
N2 C9 H9A 107.4 . . ? 
C8 C9 H9A 107.4 . . ? 
C10 C9 H9A 107.4 . . ? 
C9 C10 H10A 109.5 . . ? 
C9 C10 H10B 109.5 . . ? 
H10A C10 H10B 109.5 . . ? 
C9 C10 H10C 109.5 . . ? 
H10A C10 H10C 109.5 . . ? 
H10B C10 H10C 109.5 . . ? 
N4 C11 N2 106.9(2) . . ? 
N4 C11 H11A 110.3 . . ? 
N2 C11 H11A 110.3 . . ? 
N4 C11 H11B 110.3 . . ? 
N2 C11 H11B 110.3 . . ? 
H11A C11 H11B 108.6 . . ? 
N4 C12 C13 107.5(3) . . ? 
N4 C12 H12A 126.2 . . ? 
C13 C12 H12A 126.2 . . ? 
C12 C13 C14 106.0(3) . . ? 
C12 C13 H13A 127.0 . . ? 
C14 C13 H13A 127.0 . . ? 
N3 C14 C13 110.2(3) . . ? 
N3 C14 H14A 124.9 . . ? 
C13 C14 H14A 124.9 . . ? 
N5 C15 N2 113.5(2) . . ? 
N5 C15 H15A 108.9 . . ? 
N2 C15 H15A 108.9 . . ? 
N5 C15 H15B 108.9 . . ? 
N2 C15 H15B 108.9 . . ? 
H15A C15 H15B 107.7 . . ? 
C17 C16 N5 106.6(3) . . ? 
C17 C16 H16A 126.7 . . ? 
N5 C16 H16A 126.7 . . ? 
C16 C17 C18 105.4(3) . . ? 
C16 C17 H17A 127.3 . . ? 
C18 C17 H17A 127.3 . . ? 
N6 C18 C17 112.2(3) . . ? 
N6 C18 H18A 123.9 . . ? 
C17 C18 H18A 123.9 . . ? 
  
loop_ 
 _geom_torsion_atom_site_label_1 
 _geom_torsion_atom_site_label_2 
 _geom_torsion_atom_site_label_3 
 _geom_torsion_atom_site_label_4 
 _geom_torsion 
 _geom_torsion_site_symmetry_1 
 _geom_torsion_site_symmetry_2 
 _geom_torsion_site_symmetry_3 
 _geom_torsion_site_symmetry_4 
 _geom_torsion_publ_flag 
N1 Ni S1 C2 -4.55(12) . . . . ? 
N3 Ni S1 C2 179.49(12) . . . . ? 
N2 Ni S1 C2 158.1(6) . . . . ? 
N3 Ni N1 C7 160.2(5) . . . . ? 
N2 Ni N1 C7 -172.5(2) . . . . ? 
S1 Ni N1 C7 5.6(2) . . . . ? 
N3 Ni N1 C8 -21.7(7) . . . . ? 
N2 Ni N1 C8 5.58(19) . . . . ? 
S1 Ni N1 C8 -176.37(17) . . . . ? 
N1 Ni N2 C11 -146.27(18) . . . . ? 
N3 Ni N2 C11 29.39(18) . . . . ? 
S1 Ni N2 C11 50.9(7) . . . . ? 
N1 Ni N2 C9 -29.66(16) . . . . ? 
N3 Ni N2 C9 145.99(17) . . . . ? 
S1 Ni N2 C9 167.5(5) . . . . ? 
N1 Ni N2 C15 90.43(17) . . . . ? 
N3 Ni N2 C15 -93.92(18) . . . . ? 
S1 Ni N2 C15 -72.4(6) . . . . ? 
N1 Ni N3 C14 -170.6(5) . . . . ? 
N2 Ni N3 C14 161.9(4) . . . . ? 
S1 Ni N3 C14 -15.7(4) . . . . ? 
N1 Ni N3 N4 13.1(7) . . . . ? 
N2 Ni N3 N4 -14.33(19) . . . . ? 
S1 Ni N3 N4 168.07(18) . . . . ? 
C14 N3 N4 C12 0.5(3) . . . . ? 
Ni N3 N4 C12 178.1(2) . . . . ? 
C14 N3 N4 C11 177.0(3) . . . . ? 
Ni N3 N4 C11 -5.4(3) . . . . ? 
C16 N5 N6 C18 0.4(4) . . . . ? 
C15 N5 N6 C18 -176.9(3) . . . . ? 
Ni S1 C2 C3 2.1(3) . . . . ? 
Ni S1 C2 S2 -178.43(12) . . . . ? 
C1 S2 C2 C3 -176.5(2) . . . . ? 
C1 S2 C2 S1 4.0(2) . . . . ? 
S1 C2 C3 C7 1.8(4) . . . . ? 
S2 C2 C3 C7 -177.6(2) . . . . ? 
S1 C2 C3 C4 178.7(2) . . . . ? 
S2 C2 C3 C4 -0.7(4) . . . . ? 
C2 C3 C4 C5 172.7(3) . . . . ? 
C7 C3 C4 C5 -10.0(4) . . . . ? 
C3 C4 C5 C6 15.9(4) . . . . ? 
C4 C5 C6 C7 -15.9(4) . . . . ? 
C8 N1 C7 C3 179.2(3) . . . . ? 
Ni N1 C7 C3 -2.8(4) . . . . ? 
C8 N1 C7 C6 -0.1(4) . . . . ? 
Ni N1 C7 C6 177.9(2) . . . . ? 
C2 C3 C7 N1 -2.1(5) . . . . ? 
C4 C3 C7 N1 -179.3(3) . . . . ? 
C2 C3 C7 C6 177.3(3) . . . . ? 
C4 C3 C7 C6 0.0(3) . . . . ? 
C5 C6 C7 N1 -170.7(3) . . . . ? 
C5 C6 C7 C3 9.9(3) . . . . ? 
C7 N1 C8 C9 -161.3(2) . . . . ? 
Ni N1 C8 C9 20.4(3) . . . . ? 
C11 N2 C9 C8 159.7(2) . . . . ? 
C15 N2 C9 C8 -75.5(3) . . . . ? 
Ni N2 C9 C8 46.3(2) . . . . ? 
C11 N2 C9 C10 -74.6(3) . . . . ? 
C15 N2 C9 C10 50.2(3) . . . . ? 
Ni N2 C9 C10 172.0(2) . . . . ? 
N1 C8 C9 N2 -44.4(3) . . . . ? 
N1 C8 C9 C10 -171.5(2) . . . . ? 
C12 N4 C11 N2 -154.8(3) . . . . ? 
N3 N4 C11 N2 29.5(3) . . . . ? 
C9 N2 C11 N4 -149.5(2) . . . . ? 
C15 N2 C11 N4 86.4(3) . . . . ? 
Ni N2 C11 N4 -37.6(2) . . . . ? 
N3 N4 C12 C13 -0.5(4) . . . . ? 
C11 N4 C12 C13 -176.4(3) . . . . ? 
N4 C12 C13 C14 0.3(5) . . . . ? 
N4 N3 C14 C13 -0.3(4) . . . . ? 
Ni N3 C14 C13 -176.7(3) . . . . ? 
C12 C13 C14 N3 0.0(5) . . . . ? 
N6 N5 C15 N2 88.0(3) . . . . ? 
C16 N5 C15 N2 -88.9(4) . . . . ? 
C11 N2 C15 N5 -83.9(3) . . . . ? 
C9 N2 C15 N5 152.1(2) . . . . ? 
Ni N2 C15 N5 36.0(3) . . . . ? 
N6 N5 C16 C17 -0.6(4) . . . . ? 
C15 N5 C16 C17 176.6(3) . . . . ? 
N5 C16 C17 C18 0.5(4) . . . . ? 
N5 N6 C18 C17 -0.1(4) . . . . ? 
C16 C17 C18 N6 -0.2(5) . . . . ? 
  
_diffrn_measured_fraction_theta_max    0.982 
_diffrn_reflns_theta_full              27.50 
_diffrn_measured_fraction_theta_full   0.982 
_refine_diff_density_max    0.473 
_refine_diff_density_min   -0.429 
_refine_diff_density_rms    0.056 
  


##############################################################################
###    CIF submission form for molecular structure report (Acta Cryst. C)  ###
###    Example submission                    Version: 2.0.1  (9 May 1997)  ###
##############################################################################

# This is an electronic "form" for submitting a structural paper to Acta Cryst.
# Section C as a Crystallographic Information File. Full details of the format
# of such files are given in the paper "The Crystallographic Information File
# (CIF): a New Standard Archive File for Crystallography" by S. R. Hall, F. H.
# Allen and I. D. Brown [Acta Cryst. (1991), A47, 655-685].
#
# The current version of the core CIF dictionary is obtainable from
# ftp://ftp.iucr.ac.uk/pub/cif_core.dic. The current version number is 2.0.1.
#
# Note that all fields should be numeric or character type EXCEPT those which
# are flagged as 'text' - free-form text of any length may be included in
# these latter fields provided the text block begins and ends with a semicolon
# as the first character of a new line. Note also that the query marks
# '?' are significant as placeholders, and should not be deleted where a data
# item is not given, UNLESS the accompanying data name is also deleted.
# Lines should not exceed 80 characters in length.

#==============================================================================
data_global
#==============================================================================

_audit_creation_method        'manual editing of form.cif'

# PROCESSING SUMMARY (IUCr Office Use Only)

_journal_data_validation_number      ?

_journal_date_recd_electronic        ?
_journal_date_to_coeditor            ?
_journal_date_from_coeditor          ?
_journal_date_accepted               ?
_journal_date_printers_first         ?
_journal_date_printers_final         ?
_journal_date_proofs_out             ?
_journal_date_proofs_in              ?
_journal_coeditor_name               ?
_journal_coeditor_code               ?
_journal_coeditor_notes
; ?
;
_journal_techeditor_code             ?
_journal_techeditor_notes
; ?
;
_journal_coden_ASTM                  ?
_journal_name_full                   ?
_journal_year                        ?
_journal_volume                      ?
_journal_issue                       ?
_journal_page_first                  ?
_journal_page_last                   ?
_journal_paper_category              ?
_journal_suppl_publ_number           ?
_journal_suppl_publ_pages            ?

#==============================================================================

# SUBMISSION DETAILS

_publ_contact_author_name
_publ_contact_author_address
; 
_publ_contact_author_email
_publ_contact_author_fax
_publ_contact_author_phone

_publ_contact_letter
; Please consider this CIF submission for publication in Inorganic Chemistry
;
_publ_requested_journal    'Inorganic Chemistry'
_publ_requested_category          FI


# TITLE AND AUTHOR LIST

_publ_section_title
;
_publ_section_title_footnote
; Contribution No. ...
;
loop_
_publ_author_name
_publ_author_footnote
_publ_author_address
;
# TEXT

_publ_section_abstract
;
;

_publ_section_comment
;
;

_publ_section_acknowledgements                  ?

_publ_section_references
;
;

_publ_section_figure_captions
;
;

_publ_section_exptl_prep
;
;

_publ_section_exptl_refinement
;
;
##############################################################################
data_compound 2
 
_audit_creation_method            SHELXL-97
_chemical_name_systematic
;
 ?
;
_chemical_name_common             ?
_chemical_melting_point           ?
_chemical_formula_moiety          ?
_chemical_formula_sum             'C17 H22 N2 Ni O3 S2'
_chemical_formula_weight          425.20
 
loop_
 _atom_type_symbol
 _atom_type_description
 _atom_type_scat_dispersion_real
 _atom_type_scat_dispersion_imag
 _atom_type_scat_source
 'C'  'C'   0.0033   0.0016
 'International Tables Vol C Tables 4.2.6.8 and 6.1.1.4'
 'H'  'H'   0.0000   0.0000
 'International Tables Vol C Tables 4.2.6.8 and 6.1.1.4'
 'N'  'N'   0.0061   0.0033
 'International Tables Vol C Tables 4.2.6.8 and 6.1.1.4'
 'Ni'  'Ni'   0.3393   1.1124
 'International Tables Vol C Tables 4.2.6.8 and 6.1.1.4'
 'O'  'O'   0.0106   0.0060
 'International Tables Vol C Tables 4.2.6.8 and 6.1.1.4'
 'S'  'S'   0.1246   0.1234
 'International Tables Vol C Tables 4.2.6.8 and 6.1.1.4'
 
_symmetry_cell_setting            Monoclinic
_symmetry_space_group_name_H-M    C2/c           
 
loop_
 _symmetry_equiv_pos_as_xyz
 'x, y, z'
 '-x, y, -z+1/2'
 'x+1/2, y+1/2, z'
 '-x+1/2, y+1/2, -z+1/2'
 '-x, -y, -z'
 'x, -y, z-1/2'
 '-x+1/2, -y+1/2, -z'
 'x+1/2, -y+1/2, z-1/2'
 
_cell_length_a                    22.322(6)
_cell_length_b                    9.302(3)
_cell_length_c                    18.331(5)
_cell_angle_alpha                 90.00
_cell_angle_beta                  95.25(2)
_cell_angle_gamma                 90.00
_cell_volume                      3790.3(19)
_cell_formula_units_Z             8
_cell_measurement_temperature     293(2)
_cell_measurement_reflns_used     17
_cell_measurement_theta_max       14.74
_cell_measurement_theta_min       11.32
 
_exptl_crystal_description        block
_exptl_crystal_colour             violet
_exptl_crystal_size_max           0.494
_exptl_crystal_size_mid           0.396
_exptl_crystal_size_min           0.231
_exptl_crystal_density_meas       ?
_exptl_crystal_density_diffrn     1.487
_exptl_crystal_density_method     'not measured'
_exptl_crystal_F_000              1768
_exptl_absorpt_coefficient_mu     1.295
_exptl_absorpt_correction_type    psi-scan
_exptl_absorpt_correction_T_min   0.5280
_exptl_absorpt_correction_T_max   0.7410
_exptl_absorpt_process_details    
;
North A.C.T., Phillips D.C. & Mathews F.S. (1968) Acta. Cryst. A24, 351
Number of psi-scan sets used was   8
Theta correction was applied.
Averaged transmission function was used.
No Fourier smoothing was applied.
; 
_exptl_special_details
;
 ?
;
 
_diffrn_ambient_temperature       293(2)
_diffrn_radiation_wavelength      0.71069
_diffrn_radiation_type            MoK\a
_diffrn_radiation_source          'fine-focus sealed tube'
_diffrn_radiation_monochromator   graphite
_diffrn_measurement_device_type  'Enraf Nonius CAD4'
_diffrn_measurement_method       'non-profiled omega/2theta scans'
_diffrn_detector_area_resol_mean  ?
_diffrn_standards_number          3
_diffrn_standards_interval_count  ?
_diffrn_standards_interval_time   300
_diffrn_standards_decay_%         8
_diffrn_reflns_number             3425
_diffrn_reflns_av_R_equivalents   0.0557
_diffrn_reflns_av_sigmaI/netI     0.1413
_diffrn_reflns_limit_h_min        0
_diffrn_reflns_limit_h_max        26
_diffrn_reflns_limit_k_min        0
_diffrn_reflns_limit_k_max        11
_diffrn_reflns_limit_l_min        -21
_diffrn_reflns_limit_l_max        21
_diffrn_reflns_theta_min          2.23
_diffrn_reflns_theta_max          25.00
_reflns_number_total              3333
_reflns_number_gt                 1416
_reflns_threshold_expression      >2sigma(I)
 
_computing_data_collection        'CAD4 Express (Enraf Nonius, 1994)'
_computing_cell_refinement        'CAD4 Express (Enraf Nonius, 1994)'
_computing_data_reduction         'XCAD4 (Harms & Wocadlo, 1995)'
_computing_structure_solution     'SHELXS-97 (Sheldrick, 1990)'
_computing_structure_refinement   'SHELXL-97 (Sheldrick, 1997)'
_computing_molecular_graphics     'Ortep-3 for Windows (Farrugia, 1998)'
_computing_publication_material   'WinGX publication routines (Farrugia, 1999)'
 
_refine_special_details
;
 Refinement of F^2^ against ALL reflections.  The weighted R-factor wR and
 goodness of fit S are based on F^2^, conventional R-factors R are based
 on F, with F set to zero for negative F^2^. The threshold expression of
 F^2^ > 2sigma(F^2^) is used only for calculating R-factors(gt) etc. and is
 not relevant to the choice of reflections for refinement.  R-factors based
 on F^2^ are statistically about twice as large as those based on F, and R-
 factors based on ALL data will be even larger.
;
 
_refine_ls_structure_factor_coef  Fsqd
_refine_ls_matrix_type            full
_refine_ls_weighting_scheme       calc
_refine_ls_weighting_details
 'calc w=1/[\s^2^(Fo^2^)+(0.0785P)^2^+0.0000P] where P=(Fo^2^+2Fc^2^)/3'
_atom_sites_solution_primary      direct
_atom_sites_solution_secondary    difmap
_atom_sites_solution_hydrogens    geom
_refine_ls_hydrogen_treatment     mixed
_refine_ls_extinction_method      none
_refine_ls_extinction_coef        ?
_refine_ls_number_reflns          3333
_refine_ls_number_parameters      229
_refine_ls_number_restraints      0
_refine_ls_R_factor_all           0.2003
_refine_ls_R_factor_gt            0.0737
_refine_ls_wR_factor_ref          0.1988
_refine_ls_wR_factor_gt           0.1479
_refine_ls_goodness_of_fit_ref    1.002
_refine_ls_restrained_S_all       1.002
_refine_ls_shift/su_max           0.000
_refine_ls_shift/su_mean          0.000
 
loop_
 _atom_site_label
 _atom_site_type_symbol
 _atom_site_fract_x
 _atom_site_fract_y
 _atom_site_fract_z
 _atom_site_U_iso_or_equiv
 _atom_site_adp_type
 _atom_site_occupancy
 _atom_site_symmetry_multiplicity
 _atom_site_calc_flag
 _atom_site_refinement_flags
 _atom_site_disorder_assembly
 _atom_site_disorder_group
Ni Ni 0.64730(5) 0.75454(14) 0.52676(5) 0.0535(4) Uani 1 1 d . . .
S1 S 0.63375(11) 0.5647(3) 0.59084(12) 0.0554(7) Uani 1 1 d . B .
S2 S 0.60399(11) 0.2553(3) 0.56704(13) 0.0658(7) Uani 1 1 d . B .
N1 N 0.6842(4) 0.8915(8) 0.4675(4) 0.058(2) Uani 1 1 d . B .
N2 N 0.5909(3) 0.7090(8) 0.4495(4) 0.053(2) Uani 1 1 d . B .
O1 O 0.6856(3) 0.8201(7) 0.6145(3) 0.074(2) Uani 1 1 d . . .
O2 O 0.5943(5) 1.0287(11) 0.3408(5) 0.154(4) Uani 1 1 d . . .
C1 C 0.7222(5) 0.9320(11) 0.6244(5) 0.062(3) Uani 1 1 d . . .
C2 C 0.7460(5) 0.9615(11) 0.6962(5) 0.069(3) Uani 1 1 d . . .
HC2 H 0.7358 0.9029 0.7343 0.083 Uiso 1 1 calc R . .
C3 C 0.7840(5) 1.0752(12) 0.7112(6) 0.073(3) Uani 1 1 d . . .
HC3 H 0.7975 1.0965 0.7595 0.087 Uiso 1 1 calc R . .
C4 C 0.8025(4) 1.1580(12) 0.6555(7) 0.078(3) Uani 1 1 d . . .
HC4 H 0.8285 1.2347 0.6665 0.093 Uiso 1 1 calc R . .
C5 C 0.7832(4) 1.1293(11) 0.5847(6) 0.069(3) Uani 1 1 d . . .
HC5 H 0.7967 1.1848 0.5473 0.082 Uiso 1 1 calc R . .
C6 C 0.7425(4) 1.0144(10) 0.5679(5) 0.054(2) Uani 1 1 d . . .
C7 C 0.7227(5) 0.9870(11) 0.4925(5) 0.058(3) Uani 1 1 d . . .
HC7 H 0.746(4) 1.040(10) 0.452(5) 0.09(3) Uiso 1 1 d . . .
C8 C 0.6721(5) 0.8751(11) 0.3860(5) 0.081(3) Uani 1 1 d . . .
HC8A H 0.6962 0.9449 0.3624 0.097 Uiso 1 1 calc R A 1
HC8B H 0.6852 0.7801 0.3723 0.097 Uiso 1 1 calc R A 1
C9 C 0.6091(5) 0.8937(14) 0.3583(7) 0.032(4) Uiso 0.63(2) 1 d P B 1
HC9 H 0.6022 0.8362 0.3135 0.038 Uiso 1 1 calc R B 1
C9' C 0.5976(11) 0.875(3) 0.2965(14) 0.060(9) Uiso 0.37(2) 1 d P B 2
C10 C 0.5672(5) 0.8395(10) 0.4107(5) 0.071(3) Uani 1 1 d . . .
H10A H 0.5609 0.9140 0.4462 0.085 Uiso 1 1 calc R B 1
H10B H 0.5286 0.8177 0.3843 0.085 Uiso 1 1 calc R B 1
C11 C 0.5684(4) 0.5846(11) 0.4272(4) 0.050(2) Uani 1 1 d . . .
C12 C 0.5276(4) 0.5589(12) 0.3577(5) 0.072(3) Uani 1 1 d . B .
H12A H 0.4866 0.5871 0.3643 0.086 Uiso 1 1 calc R . .
H12B H 0.5414 0.6131 0.3173 0.086 Uiso 1 1 calc R . .
C13 C 0.5312(5) 0.3990(12) 0.3435(5) 0.078(3) Uani 1 1 d . . .
H13A H 0.5623 0.3780 0.3113 0.094 Uiso 1 1 calc R B .
H13B H 0.4931 0.3629 0.3212 0.094 Uiso 1 1 calc R . .
C14 C 0.5467(4) 0.3314(11) 0.4192(5) 0.068(3) Uani 1 1 d . B .
H14A H 0.5105 0.2996 0.4401 0.082 Uiso 1 1 calc R . .
H14B H 0.5735 0.2499 0.4162 0.082 Uiso 1 1 calc R . .
C15 C 0.5772(4) 0.4513(10) 0.4644(4) 0.049(2) Uani 1 1 d . B .
C16 C 0.6033(3) 0.4344(9) 0.5344(4) 0.044(2) Uani 1 1 d . . .
C17 C 0.6393(5) 0.2655(11) 0.6574(5) 0.079(3) Uani 1 1 d . . .
H17A H 0.6411 0.1713 0.6789 0.119 Uiso 1 1 calc R B .
H17B H 0.6166 0.3281 0.6861 0.119 Uiso 1 1 calc R . .
H17C H 0.6793 0.3027 0.6562 0.119 Uiso 1 1 calc R . .
OW O 0.5977(7) 1.1240(16) 0.2017(7) 0.101(5) Uiso 0.63(2) 1 d P B 1
OW' O 0.5663(10) 1.070(2) 0.1857(10) 0.067(7) Uiso 0.37(2) 1 d P B 2
 
loop_
 _atom_site_aniso_label
 _atom_site_aniso_U_11
 _atom_site_aniso_U_22
 _atom_site_aniso_U_33
 _atom_site_aniso_U_23
 _atom_site_aniso_U_13
 _atom_site_aniso_U_12
Ni 0.0778(8) 0.0484(7) 0.0355(6) 0.0029(7) 0.0106(5) 0.0008(8)
S1 0.0763(17) 0.0517(15) 0.0372(12) 0.0042(12) 0.0005(11) -0.0043(14)
S2 0.0809(18) 0.0484(15) 0.0686(16) 0.0004(16) 0.0097(13) 0.0022(17)
N1 0.072(5) 0.053(5) 0.050(5) 0.000(4) 0.021(4) 0.004(5)
N2 0.067(5) 0.054(6) 0.040(4) 0.003(4) 0.021(4) 0.014(4)
O1 0.121(6) 0.054(4) 0.047(4) 0.003(3) 0.014(4) -0.024(4)
O2 0.258(12) 0.113(8) 0.097(7) -0.015(6) 0.048(8) 0.014(8)
C1 0.087(8) 0.048(6) 0.052(6) 0.007(5) 0.014(6) 0.014(6)
C2 0.091(8) 0.050(7) 0.064(7) 0.001(5) 0.003(6) -0.006(6)
C3 0.083(8) 0.070(8) 0.061(7) -0.003(6) -0.013(6) 0.009(7)
C4 0.056(7) 0.077(8) 0.098(9) -0.011(8) 0.000(7) -0.016(6)
C5 0.061(7) 0.062(7) 0.086(8) 0.007(6) 0.023(6) -0.001(6)
C6 0.056(6) 0.050(6) 0.061(6) 0.005(5) 0.023(5) 0.003(5)
C7 0.067(7) 0.052(7) 0.060(7) 0.009(6) 0.030(6) 0.018(6)
C8 0.132(10) 0.068(7) 0.049(6) -0.005(5) 0.047(6) 0.003(7)
C10 0.097(8) 0.052(7) 0.064(6) 0.007(5) 0.009(6) 0.027(6)
C11 0.047(6) 0.066(7) 0.037(5) -0.003(5) 0.007(4) 0.006(6)
C12 0.068(7) 0.095(9) 0.052(6) -0.004(6) 0.003(5) 0.002(7)
C13 0.075(7) 0.096(9) 0.062(7) -0.028(7) -0.002(6) 0.010(7)
C14 0.074(7) 0.072(7) 0.059(6) -0.023(6) 0.008(5) -0.002(6)
C15 0.046(5) 0.063(7) 0.041(5) -0.013(5) 0.014(4) 0.003(5)
C16 0.041(5) 0.049(6) 0.044(5) -0.005(4) 0.010(4) 0.001(5)
C17 0.103(8) 0.073(8) 0.063(6) 0.017(6) 0.011(6) 0.004(7)
 
_geom_special_details
;
 All esds (except the esd in the dihedral angle between two l.s. planes)
 are estimated using the full covariance matrix.  The cell esds are taken
 into account individually in the estimation of esds in distances, angles
 and torsion angles; correlations between esds in cell parameters are only
 used when they are defined by crystal symmetry.  An approximate (isotropic)
 treatment of cell esds is used for estimating esds involving l.s. planes.
;
 
loop_
 _geom_bond_atom_site_label_1
 _geom_bond_atom_site_label_2
 _geom_bond_distance
 _geom_bond_site_symmetry_2
 _geom_bond_publ_flag
Ni O1 1.854(6) . ?
Ni N2 1.856(8) . ?
Ni N1 1.909(8) . ?
Ni S1 2.158(3) . ?
S1 C16 1.695(8) . ?
S2 C16 1.769(9) . ?
S2 C17 1.771(9) . ?
N1 C7 1.290(11) . ?
N1 C8 1.502(10) . ?
N2 C11 1.312(10) . ?
N2 C10 1.480(10) . ?
O1 C1 1.326(11) . ?
O2 C9 1.330(14) . ?
O2 C9' 1.65(3) . ?
C1 C6 1.397(12) . ?
C1 C2 1.400(12) . ?
C2 C3 1.369(12) . ?
C3 C4 1.371(13) . ?
C4 C5 1.356(13) . ?
C5 C6 1.419(12) . ?
C6 C7 1.435(13) . ?
C8 C9 1.463(14) . ?
C9 C10 1.488(14) . ?
C11 C15 1.420(12) . ?
C11 C12 1.515(11) . ?
C12 C13 1.514(13) . ?
C13 C14 1.534(12) . ?
C14 C15 1.514(11) . ?
C15 C16 1.369(11) . ?
 
loop_
 _geom_angle_atom_site_label_1
 _geom_angle_atom_site_label_2
 _geom_angle_atom_site_label_3
 _geom_angle
 _geom_angle_site_symmetry_1
 _geom_angle_site_symmetry_3
 _geom_angle_publ_flag
O1 Ni N2 164.6(3) . . ?
O1 Ni N1 94.9(3) . . ?
N2 Ni N1 90.9(3) . . ?
O1 Ni S1 82.7(2) . . ?
N2 Ni S1 96.3(2) . . ?
N1 Ni S1 161.0(2) . . ?
C16 S1 Ni 108.7(3) . . ?
C16 S2 C17 104.8(4) . . ?
C7 N1 C8 118.4(8) . . ?
C7 N1 Ni 124.5(7) . . ?
C8 N1 Ni 116.8(7) . . ?
C11 N2 C10 117.7(8) . . ?
C11 N2 Ni 130.7(6) . . ?
C10 N2 Ni 111.5(6) . . ?
C1 O1 Ni 127.4(6) . . ?
C9 O2 C9' 43.9(10) . . ?
O1 C1 C6 124.5(9) . . ?
O1 C1 C2 117.3(9) . . ?
C6 C1 C2 118.0(10) . . ?
C3 C2 C1 120.9(10) . . ?
C2 C3 C4 120.5(9) . . ?
C5 C4 C3 120.7(10) . . ?
C4 C5 C6 119.8(10) . . ?
C1 C6 C5 119.7(9) . . ?
C1 C6 C7 121.7(9) . . ?
C5 C6 C7 118.6(9) . . ?
N1 C7 C6 126.8(9) . . ?
C9 C8 N1 114.4(8) . . ?
O2 C9 C8 113.9(11) . . ?
O2 C9 C10 108.6(10) . . ?
C8 C9 C10 112.1(10) . . ?
N2 C10 C9 111.7(8) . . ?
N2 C11 C15 126.1(8) . . ?
N2 C11 C12 125.7(9) . . ?
C15 C11 C12 108.2(8) . . ?
C13 C12 C11 105.2(8) . . ?
C12 C13 C14 105.0(8) . . ?
C15 C14 C13 104.2(8) . . ?
C16 C15 C11 125.3(8) . . ?
C16 C15 C14 124.0(9) . . ?
C11 C15 C14 110.2(8) . . ?
C15 C16 S1 127.1(7) . . ?
C15 C16 S2 114.5(7) . . ?
S1 C16 S2 118.4(5) . . ?
 
loop_
 _geom_torsion_atom_site_label_1
 _geom_torsion_atom_site_label_2
 _geom_torsion_atom_site_label_3
 _geom_torsion_atom_site_label_4
 _geom_torsion
 _geom_torsion_site_symmetry_1
 _geom_torsion_site_symmetry_2
 _geom_torsion_site_symmetry_3
 _geom_torsion_site_symmetry_4
 _geom_torsion_publ_flag
O1 Ni S1 C16 -173.1(4) . . . . ?
N2 Ni S1 C16 22.4(4) . . . . ?
N1 Ni S1 C16 -89.3(8) . . . . ?
O1 Ni N1 C7 0.9(8) . . . . ?
N2 Ni N1 C7 166.6(8) . . . . ?
S1 Ni N1 C7 -80.9(11) . . . . ?
O1 Ni N1 C8 174.0(7) . . . . ?
N2 Ni N1 C8 -20.3(7) . . . . ?
S1 Ni N1 C8 92.2(10) . . . . ?
O1 Ni N2 C11 -108.5(13) . . . . ?
N1 Ni N2 C11 139.3(8) . . . . ?
S1 Ni N2 C11 -23.0(8) . . . . ?
O1 Ni N2 C10 68.5(14) . . . . ?
N1 Ni N2 C10 -43.6(6) . . . . ?
S1 Ni N2 C10 154.0(5) . . . . ?
N2 Ni O1 C1 -108.0(13) . . . . ?
N1 Ni O1 C1 3.7(8) . . . . ?
S1 Ni O1 C1 164.7(8) . . . . ?
Ni O1 C1 C6 -5.8(14) . . . . ?
Ni O1 C1 C2 179.9(7) . . . . ?
O1 C1 C2 C3 -179.9(9) . . . . ?
C6 C1 C2 C3 5.4(15) . . . . ?
C1 C2 C3 C4 -3.8(16) . . . . ?
C2 C3 C4 C5 0.3(16) . . . . ?
C3 C4 C5 C6 1.4(16) . . . . ?
O1 C1 C6 C5 -178.0(9) . . . . ?
C2 C1 C6 C5 -3.7(13) . . . . ?
O1 C1 C6 C7 2.7(14) . . . . ?
C2 C1 C6 C7 177.0(9) . . . . ?
C4 C5 C6 C1 0.4(14) . . . . ?
C4 C5 C6 C7 179.7(9) . . . . ?
C8 N1 C7 C6 -176.7(9) . . . . ?
Ni N1 C7 C6 -3.7(13) . . . . ?
C1 C6 C7 N1 2.3(15) . . . . ?
C5 C6 C7 N1 -177.0(9) . . . . ?
C7 N1 C8 C9 -122.8(10) . . . . ?
Ni N1 C8 C9 63.7(11) . . . . ?
C9' O2 C9 C8 115.8(18) . . . . ?
C9' O2 C9 C10 -118.5(18) . . . . ?
N1 C8 C9 O2 89.6(12) . . . . ?
N1 C8 C9 C10 -34.3(14) . . . . ?
C11 N2 C10 C9 -102.0(10) . . . . ?
Ni N2 C10 C9 80.5(9) . . . . ?
O2 C9 C10 N2 -163.0(9) . . . . ?
C8 C9 C10 N2 -36.2(13) . . . . ?
C10 N2 C11 C15 -168.5(8) . . . . ?
Ni N2 C11 C15 8.4(14) . . . . ?
C10 N2 C11 C12 10.6(13) . . . . ?
Ni N2 C11 C12 -172.4(6) . . . . ?
N2 C11 C12 C13 161.4(9) . . . . ?
C15 C11 C12 C13 -19.4(10) . . . . ?
C11 C12 C13 C14 26.8(11) . . . . ?
C12 C13 C14 C15 -24.4(11) . . . . ?
N2 C11 C15 C16 10.2(15) . . . . ?
C12 C11 C15 C16 -169.0(8) . . . . ?
N2 C11 C15 C14 -176.9(9) . . . . ?
C12 C11 C15 C14 3.8(10) . . . . ?
C13 C14 C15 C16 -174.1(8) . . . . ?
C13 C14 C15 C11 13.0(10) . . . . ?
C11 C15 C16 S1 -3.2(13) . . . . ?
C14 C15 C16 S1 -175.1(7) . . . . ?
C11 C15 C16 S2 176.6(7) . . . . ?
C14 C15 C16 S2 4.7(11) . . . . ?
Ni S1 C16 C15 -15.2(8) . . . . ?
Ni S1 C16 S2 165.0(4) . . . . ?
C17 S2 C16 C15 -179.7(6) . . . . ?
C17 S2 C16 S1 0.2(6) . . . . ?
 
loop_
 _geom_hbond_atom_site_label_D
 _geom_hbond_atom_site_label_H
 _geom_hbond_atom_site_label_A
 _geom_hbond_distance_DH
 _geom_hbond_distance_HA
 _geom_hbond_distance_DA
 _geom_hbond_angle_DHA
 _geom_hbond_site_symmetry_A

Least-squares planes (x,y,z in crystal coordinates) and deviations from them
 (* indicates atom used to define plane)
 
  19.5682 (0.0214) x - 2.4693 (0.0188) y - 8.7951 (0.0337) z = 5.9816 (0.0305)
 *   -0.0608 (0.0062)  C11
 *    0.1150 (0.0059)  C15
 *    0.0512 (0.0050)  C16
 *   -0.1712 (0.0033)  S1
 *    0.1889 (0.0028)  Ni
 *   -0.1232 (0.0051)  N2
      1.0930 (0.0095)  N1
      0.0058 (0.0086)  O1
 Rms deviation of fitted atoms =   0.1289
 
 17.2414 (0.0334) x - 5.8622 (0.0170) y - 2.7387 (0.0533) z = 5.3030 (0.0449)
 Angle to previous plane (with approximate esd) = 28.82 ( 0.22 )
 *   -0.0246 (0.0063)  C1
 *   -0.0032 (0.0063)  C6
 *    0.0218 (0.0063)  C7
 *   -0.0136 (0.0051)  N1
 *   -0.0085 (0.0037)  Ni
 *    0.0281 (0.0052)  O1
     -0.5028 (0.0100)  N2
      0.6953 (0.0081)  S1
 Rms deviation of fitted atoms =   0.0189
 
 20.5111 (0.0398) x - 0.7289 (0.0468) y - 8.5992 (0.0720) z = 7.4864 (0.0561)
 Angle to previous plane (with approximate esd) = 37.84 ( 0.32 )
 *    0.0715 (0.0059)  C11
 *   -0.1476 (0.0067)  C12
 *    0.1654 (0.0070)  C13
 *   -0.1202 (0.0063)  C14
 *    0.0309 (0.0058)  C15
     -0.0241 (0.0141)  C16
      0.2512 (0.0147)  N2
 Rms deviation of fitted atoms =   0.1180
 
 17.4448 (0.0535) x - 5.7593 (0.0280) y - 2.7143 (0.0697) z = 5.5613 (0.0812)
 Angle to previous plane (with approximate esd) = 37.22 ( 0.36 )
 *   -0.0250 (0.0068)  C1
 *    0.0251 (0.0072)  C2
 *   -0.0070 (0.0072)  C3
 *   -0.0111 (0.0076)  C4
 *    0.0104 (0.0070)  C5
 *    0.0077 (0.0063)  C6
      0.0240 (0.0143)  C7
      0.0086 (0.0134)  O1
 Rms deviation of fitted atoms =   0.0163

 17.3828 (0.0401) x - 5.1472 (0.0179) y - 6.7022 (0.0424) z = 3.8691 (0.0518)
 Angle to previous plane (with approximate esd) = 13.13 ( 0.42 )
 
 *   -0.0314 (0.0027)  Ni
 *    0.2805 (0.0032)  S1
 *    0.3013 (0.0032)  N1
 *   -0.2601 (0.0032)  N2
 *   -0.2903 (0.0037)  O1
 Rms deviation of fitted atoms =   0.2539
 
_diffrn_measured_fraction_theta_max    0.996
_diffrn_reflns_theta_full              25.00
_diffrn_measured_fraction_theta_full   0.996
_refine_diff_density_max    0.624
_refine_diff_density_min   -0.391
_refine_diff_density_rms    0.089


##############################################################################
data_compound 3
 
_audit_creation_method            SHELXL-97
_chemical_name_systematic
;
 ?
;
_chemical_name_common             ?
_chemical_melting_point           ?
_chemical_formula_moiety          'C28 H43 Cl N8 Ni2 O7 S2'
_chemical_formula_sum             'C28 H43 Cl N8 Ni2 O7 S2'
_chemical_formula_weight          820.69
 
loop_
 _atom_type_symbol
 _atom_type_description
 _atom_type_scat_dispersion_real
 _atom_type_scat_dispersion_imag
 _atom_type_scat_source
 'C'  'C'   0.0033   0.0016
 'International Tables Vol C Tables 4.2.6.8 and 6.1.1.4'
 'H'  'H'   0.0000   0.0000
 'International Tables Vol C Tables 4.2.6.8 and 6.1.1.4'
 'Cl'  'Cl'   0.1484   0.1585
 'International Tables Vol C Tables 4.2.6.8 and 6.1.1.4'
 'N'  'N'   0.0061   0.0033
 'International Tables Vol C Tables 4.2.6.8 and 6.1.1.4'
 'Ni'  'Ni'   0.3393   1.1124
 'International Tables Vol C Tables 4.2.6.8 and 6.1.1.4'
 'O'  'O'   0.0106   0.0060
 'International Tables Vol C Tables 4.2.6.8 and 6.1.1.4'
 'S'  'S'   0.1246   0.1234
 'International Tables Vol C Tables 4.2.6.8 and 6.1.1.4'
 
_symmetry_cell_setting            monoclinic
_symmetry_space_group_name_H-M    'P 21/n'  
 
loop_
 _symmetry_equiv_pos_as_xyz
 'x, y, z'
 '-x+1/2, y+1/2, -z+1/2'
 '-x, -y, -z'
 'x-1/2, -y-1/2, z-1/2'
 
_cell_length_a                    21.558(3)
_cell_length_b                    11.428(5)
_cell_length_c                    15.4938(19)
_cell_angle_alpha                 90.00
_cell_angle_beta                  106.911(10)
_cell_angle_gamma                 90.00
_cell_volume                      3652.2(17)
_cell_formula_units_Z             4
_cell_measurement_temperature     293(2)
_cell_measurement_reflns_used     25    
_cell_measurement_theta_min       11.29 
_cell_measurement_theta_max       13.94 
 
_exptl_crystal_description        plate         
_exptl_crystal_colour             'light violet'
_exptl_crystal_size_max           0.26
_exptl_crystal_size_mid           0.26
_exptl_crystal_size_min           0.12
_exptl_crystal_density_meas       ?
_exptl_crystal_density_diffrn     1.493
_exptl_crystal_density_method     'not measured'
_exptl_crystal_F_000              1712
_exptl_absorpt_coefficient_mu     1.272
_exptl_absorpt_correction_type    psi-scan
_exptl_absorpt_correction_T_min   0.7300
_exptl_absorpt_correction_T_max   0.8665
_exptl_absorpt_process_details    ?
 
_exptl_special_details
;
 ?
;
 
_diffrn_ambient_temperature       293(2)
_diffrn_radiation_wavelength      0.71073
_diffrn_radiation_type            MoK\a
_diffrn_radiation_source          'fine-focus sealed tube'
_diffrn_radiation_monochromator   graphite
_diffrn_measurement_device_type   'Enraf Nonius CAD4'              
_diffrn_measurement_method        'non-profiled omega/2theta scans'
_diffrn_detector_area_resol_mean  ?
_diffrn_standards_number          3
_diffrn_standards_interval_count  ?
_diffrn_standards_interval_time   300
_diffrn_standards_decay_%         0
_diffrn_reflns_number             5442
_diffrn_reflns_av_R_equivalents   0.0000
_diffrn_reflns_av_sigmaI/netI     0.0890
_diffrn_reflns_limit_h_min        -25
_diffrn_reflns_limit_h_max        24
_diffrn_reflns_limit_k_min        0
_diffrn_reflns_limit_k_max        13
_diffrn_reflns_limit_l_min        0
_diffrn_reflns_limit_l_max        18
_diffrn_reflns_theta_min          2.04
_diffrn_reflns_theta_max          24.97
_reflns_number_total              5442
_reflns_number_gt                 3222
_reflns_threshold_expression      >2sigma(I)
 
_computing_data_collection        'CAD4 Express (Enraf Nonius, 1994)'          
_computing_cell_refinement        'CAD4 Express (Enraf Nonius, 1994)'          
_computing_data_reduction         'XCAD4 (Harms & Wocadlo, 1995)'              
_computing_structure_solution     'SHELXS-97 (Sheldrick, 1990)'                                               
_computing_structure_refinement   'SHELXL-97 (Sheldrick, 1997)'                
_computing_molecular_graphics     'Ortep-3 for Windows (Farrugia, 1997)'       
_computing_publication_material   'WinGX publication routines (Farrugia, 1998)'
 
_refine_special_details
;
 Refinement of F^2^ against ALL reflections.  The weighted R-factor wR and
 goodness of fit S are based on F^2^, conventional R-factors R are based
 on F, with F set to zero for negative F^2^. The threshold expression of
 F^2^ > 2sigma(F^2^) is used only for calculating R-factors(gt) etc. and is
 not relevant to the choice of reflections for refinement.  R-factors based
 on F^2^ are statistically about twice as large as those based on F, and R-
 factors based on ALL data will be even larger.
;
 
_refine_ls_structure_factor_coef  Fsqd
_refine_ls_matrix_type            full
_refine_ls_weighting_scheme       calc
_refine_ls_weighting_details
 'calc w=1/[\s^2^(Fo^2^)+(0.0473P)^2^+0.0000P] where P=(Fo^2^+2Fc^2^)/3'
_atom_sites_solution_primary      direct
_atom_sites_solution_secondary    difmap
_atom_sites_solution_hydrogens    geom
_refine_ls_hydrogen_treatment     mixed
_refine_ls_extinction_method      none
_refine_ls_extinction_coef        ?
_refine_ls_number_reflns          5442
_refine_ls_number_parameters      433
_refine_ls_number_restraints      0
_refine_ls_R_factor_all           0.0919
_refine_ls_R_factor_gt            0.0444
_refine_ls_wR_factor_ref          0.1027
_refine_ls_wR_factor_gt           0.0864
_refine_ls_goodness_of_fit_ref    0.834
_refine_ls_restrained_S_all       0.834
_refine_ls_shift/su_max           0.000
_refine_ls_shift/su_mean          0.000
 
loop_
 _atom_site_label
 _atom_site_type_symbol
 _atom_site_fract_x
 _atom_site_fract_y
 _atom_site_fract_z
 _atom_site_U_iso_or_equiv
 _atom_site_adp_type
 _atom_site_occupancy
 _atom_site_symmetry_multiplicity
 _atom_site_calc_flag
 _atom_site_refinement_flags
 _atom_site_disorder_assembly
 _atom_site_disorder_group
Ni1 Ni 0.09882(3) 0.68057(6) 0.44854(4) 0.03704(18) Uani 1 1 d . . .
Ni2 Ni 0.07027(3) 0.83260(6) 0.25343(4) 0.0432(2) Uani 1 1 d . . .
S1 S 0.18230(8) 0.49901(16) 0.74308(9) 0.0646(5) Uani 1 1 d . . .
S2 S 0.13966(7) 0.66991(15) 0.59176(9) 0.0581(4) Uani 1 1 d . . .
N1 N 0.06836(18) 0.5268(4) 0.4301(2) 0.0366(10) Uani 1 1 d . . .
N2 N 0.01344(19) 0.7200(4) 0.1453(2) 0.0418(11) Uani 1 1 d . . .
N3 N 0.1192(2) 0.6779(4) 0.1393(3) 0.0462(11) Uani 1 1 d . . .
N4 N 0.1439(2) 0.7434(4) 0.2159(3) 0.0474(12) Uani 1 1 d . . .
N5 N -0.0669(2) 0.8453(4) 0.1668(3) 0.0527(12) Uani 1 1 d . . .
N6 N -0.0235(2) 0.9045(4) 0.2346(3) 0.0497(12) Uani 1 1 d . . .
N7 N 0.1174(2) 0.9046(4) 0.3726(3) 0.0456(11) Uani 1 1 d . . .
N8 N 0.12894(19) 0.8401(4) 0.4514(3) 0.0444(11) Uani 1 1 d . . .
Cl1 Cl 0.02993(9) 1.26634(14) 0.15651(9) 0.0596(4) Uani 1 1 d . . .
C1 C 0.1905(3) 0.6429(6) 0.7944(4) 0.079(2) Uani 1 1 d . . .
HC1A H 0.2123 0.6362 0.8578 0.118 Uiso 1 1 calc R . .
HC1B H 0.1483 0.6763 0.7860 0.118 Uiso 1 1 calc R . .
HC1C H 0.2152 0.6923 0.7667 0.118 Uiso 1 1 calc R . .
C2 C 0.1410(3) 0.5295(6) 0.6284(3) 0.0528(15) Uani 1 1 d . . .
C3 C 0.1152(3) 0.4336(5) 0.5783(4) 0.0486(15) Uani 1 1 d . . .
C4 C 0.1187(3) 0.3081(5) 0.6119(4) 0.0575(16) Uani 1 1 d . . .
HC4A H 0.1135 0.3052 0.6720 0.069 Uiso 1 1 calc R . .
HC4B H 0.1600 0.2730 0.6135 0.069 Uiso 1 1 calc R . .
C5 C 0.0633(3) 0.2449(5) 0.5448(4) 0.0555(16) Uani 1 1 d . . .
HC5A H 0.0250 0.2439 0.5656 0.067 Uiso 1 1 calc R . .
HC5B H 0.0754 0.1649 0.5362 0.067 Uiso 1 1 calc R . .
C6 C 0.0507(3) 0.3146(5) 0.4568(3) 0.0556(15) Uani 1 1 d . . .
HC6A H 0.0726 0.2785 0.4170 0.067 Uiso 1 1 calc R . .
HC6B H 0.0046 0.3179 0.4259 0.067 Uiso 1 1 calc R . .
C7 C 0.0775(2) 0.4370(4) 0.4839(3) 0.0401(13) Uani 1 1 d . . .
C8 C 0.0252(3) 0.5087(4) 0.3375(3) 0.0465(14) Uani 1 1 d . . .
HC8A H -0.0197 0.5202 0.3357 0.056 Uiso 1 1 calc R . .
HC8B H 0.0302 0.4300 0.3169 0.056 Uiso 1 1 calc R . .
C9 C 0.0454(3) 0.5976(5) 0.2794(3) 0.0537(16) Uani 1 1 d . . .
HC9 H 0.0859 0.5710 0.2694 0.064 Uiso 1 1 calc R . .
C10 C -0.0027(3) 0.6153(5) 0.1906(3) 0.0540(15) Uani 1 1 d . . .
H10A H -0.0455 0.6247 0.1984 0.065 Uiso 1 1 calc R . .
H10B H -0.0036 0.5470 0.1531 0.065 Uiso 1 1 calc R . .
C11 C 0.0542(3) 0.6969(5) 0.0842(3) 0.0629(18) Uani 1 1 d . . .
H11A H 0.0384 0.6284 0.0474 0.076 Uiso 1 1 calc R . .
H11B H 0.0526 0.7633 0.0446 0.076 Uiso 1 1 calc R . .
C12 C 0.1662(4) 0.6093(5) 0.1237(4) 0.0610(17) Uani 1 1 d . . .
C13 C 0.1508(3) 0.5312(5) 0.0409(3) 0.0563(16) Uani 1 1 d . . .
H13A H 0.1060 0.5396 0.0075 0.084 Uiso 1 1 calc R . .
H13B H 0.1594 0.4511 0.0593 0.084 Uiso 1 1 calc R . .
H13C H 0.1774 0.5533 0.0035 0.084 Uiso 1 1 calc R . .
C14 C 0.2220(3) 0.6292(6) 0.1896(4) 0.0708(19) Uani 1 1 d . . .
HC14 H 0.2622 0.5951 0.1955 0.085 Uiso 1 1 calc R . .
C15 C 0.2068(3) 0.7116(5) 0.2471(4) 0.0570(16) Uani 1 1 d . . .
C16 C 0.2504(3) 0.7652(6) 0.3300(4) 0.080(2) Uani 1 1 d . . .
H16A H 0.2266 0.8215 0.3537 0.121 Uiso 1 1 calc R . .
H16B H 0.2858 0.8034 0.3156 0.121 Uiso 1 1 calc R . .
H16C H 0.2670 0.7054 0.3742 0.121 Uiso 1 1 calc R . .
C17 C -0.0435(3) 0.7902(5) 0.0991(3) 0.0560(16) Uani 1 1 d . . .
H17A H -0.0318 0.8490 0.0615 0.067 Uiso 1 1 calc R . .
H17B H -0.0769 0.7406 0.0610 0.067 Uiso 1 1 calc R . .
C18 C -0.1283(3) 0.8665(6) 0.1652(4) 0.0665(18) Uani 1 1 d . . .
C19 C -0.1849(3) 0.8136(7) 0.0984(5) 0.097(2) Uani 1 1 d . . .
H19A H -0.1702 0.7658 0.0573 0.145 Uiso 1 1 calc R . .
H19B H -0.2125 0.8744 0.0656 0.145 Uiso 1 1 calc R . .
H19C H -0.2086 0.7662 0.1291 0.145 Uiso 1 1 calc R . .
C20 C -0.1244(4) 0.9410(5) 0.2358(4) 0.0691(19) Uani 1 1 d . . .
H20A H -0.1590 0.9720 0.2528 0.083 Uiso 1 1 calc R . .
C21 C -0.0595(3) 0.9611(5) 0.2769(4) 0.0516(15) Uani 1 1 d . . .
C22 C -0.0283(3) 1.0351(5) 0.3562(3) 0.0564(16) Uani 1 1 d . . .
H22A H 0.0180 1.0307 0.3688 0.085 Uiso 1 1 calc R . .
H22B H -0.0405 1.0077 0.4075 0.085 Uiso 1 1 calc R . .
H22C H -0.0421 1.1147 0.3436 0.085 Uiso 1 1 calc R . .
C23 C 0.1427(3) 1.0096(5) 0.3942(5) 0.0614(17) Uani 1 1 d . . .
HC23 H 0.1407 1.0703 0.3535 0.074 Uiso 1 1 calc R . .
C24 C 0.1722(3) 1.0163(6) 0.4852(4) 0.0643(17) Uani 1 1 d . . .
HC24 H 0.1936 1.0802 0.5178 0.077 Uiso 1 1 calc R . .
C25 C 0.1633(3) 0.9084(5) 0.5174(4) 0.0579(16) Uani 1 1 d . . .
HC25 H 0.1791 0.8858 0.5775 0.069 Uiso 1 1 calc R . .
C26 C 0.2140(3) 0.9134(6) 0.0583(5) 0.0640(18) Uani 1 1 d . . .
C27 C 0.1966(4) 0.8544(6) -0.0292(4) 0.094(2) Uani 1 1 d . . .
H27A H 0.1503 0.8535 -0.0541 0.141 Uiso 1 1 calc R . .
H27B H 0.2126 0.7755 -0.0217 0.141 Uiso 1 1 calc R . .
H27C H 0.2156 0.8954 -0.0694 0.141 Uiso 1 1 calc R . .
C28 C 0.2802(3) 0.9234(6) 0.1041(4) 0.080(2) Uani 1 1 d . . .
H28A H 0.2855 0.9623 0.1607 0.120 Uiso 1 1 calc R . .
H28B H 0.3013 0.9680 0.0683 0.120 Uiso 1 1 calc R . .
H28C H 0.2992 0.8468 0.1148 0.120 Uiso 1 1 calc R . .
O1 O 0.05752(16) 0.6992(3) 0.3275(2) 0.0416(9) Uani 1 1 d . . .
O2 O 0.08496(17) 0.9665(3) 0.1687(2) 0.0517(10) Uani 1 1 d . . .
O3 O -0.0300(2) 1.3142(4) 0.1580(3) 0.0744(12) Uani 1 1 d . . .
O4 O 0.0531(2) 1.3469(4) 0.1117(3) 0.0743(12) Uani 1 1 d . . .
O5 O 0.0137(2) 1.1615(3) 0.1037(2) 0.0645(11) Uani 1 1 d . . .
O6 O 0.0705(2) 1.2431(4) 0.2392(2) 0.0691(12) Uani 1 1 d . . .
O7 O 0.1771(2) 0.9568(4) 0.0851(3) 0.0832(15) Uani 1 1 d . . .
 
loop_
 _atom_site_aniso_label
 _atom_site_aniso_U_11
 _atom_site_aniso_U_22
 _atom_site_aniso_U_33
 _atom_site_aniso_U_23
 _atom_site_aniso_U_13
 _atom_site_aniso_U_12
Ni1 0.0390(4) 0.0421(4) 0.0317(3) -0.0028(3) 0.0129(3) -0.0029(4)
Ni2 0.0567(5) 0.0394(4) 0.0390(4) 0.0049(3) 0.0226(3) 0.0077(4)
S1 0.0653(10) 0.0792(12) 0.0414(8) 0.0120(8) 0.0032(7) -0.0026(9)
S2 0.0603(10) 0.0757(11) 0.0331(7) -0.0015(8) 0.0054(7) -0.0148(9)
N1 0.042(3) 0.039(3) 0.033(2) 0.004(2) 0.0180(19) -0.001(2)
N2 0.041(3) 0.051(3) 0.033(2) 0.005(2) 0.010(2) 0.016(2)
N3 0.056(3) 0.050(3) 0.039(2) 0.006(2) 0.024(2) 0.018(3)
N4 0.057(3) 0.048(3) 0.043(3) 0.007(2) 0.023(2) 0.013(2)
N5 0.047(3) 0.062(3) 0.048(3) 0.007(3) 0.013(2) 0.024(3)
N6 0.054(3) 0.053(3) 0.047(3) 0.010(2) 0.023(3) 0.013(3)
N7 0.052(3) 0.037(3) 0.055(3) 0.001(2) 0.027(2) 0.005(2)
N8 0.041(3) 0.046(3) 0.048(3) -0.007(3) 0.017(2) -0.002(2)
Cl1 0.0872(12) 0.0467(10) 0.0450(9) 0.0007(8) 0.0195(9) 0.0114(9)
C1 0.082(5) 0.102(6) 0.041(3) 0.000(4) -0.001(3) -0.004(4)
C2 0.048(4) 0.077(4) 0.030(3) 0.014(3) 0.007(3) 0.014(3)
C3 0.041(3) 0.063(4) 0.050(3) 0.019(3) 0.027(3) 0.008(3)
C4 0.064(4) 0.056(4) 0.055(3) 0.016(3) 0.023(3) 0.007(3)
C5 0.065(4) 0.043(4) 0.065(4) 0.005(3) 0.029(3) 0.001(3)
C6 0.071(4) 0.047(4) 0.056(3) 0.005(3) 0.030(3) 0.002(3)
C7 0.040(3) 0.035(3) 0.051(3) 0.000(3) 0.023(3) 0.006(3)
C8 0.059(4) 0.038(3) 0.039(3) -0.003(3) 0.009(3) -0.007(3)
C9 0.071(4) 0.049(4) 0.035(3) 0.009(3) 0.006(3) 0.002(3)
C10 0.064(4) 0.050(4) 0.041(3) -0.011(3) 0.003(3) -0.003(3)
C11 0.079(4) 0.078(5) 0.037(3) 0.001(3) 0.024(3) 0.038(4)
C12 0.096(5) 0.043(4) 0.053(4) 0.005(3) 0.037(4) 0.011(4)
C13 0.057(4) 0.059(4) 0.057(4) -0.009(3) 0.023(3) 0.012(3)
C14 0.060(4) 0.076(5) 0.082(5) -0.007(4) 0.029(4) 0.014(4)
C15 0.075(5) 0.046(4) 0.058(4) 0.011(3) 0.031(4) -0.001(3)
C16 0.066(5) 0.088(5) 0.082(5) -0.014(4) 0.014(4) 0.000(4)
C17 0.060(4) 0.063(4) 0.037(3) 0.007(3) 0.003(3) 0.014(3)
C18 0.066(5) 0.066(5) 0.065(4) 0.014(4) 0.016(4) 0.007(4)
C19 0.072(5) 0.114(7) 0.099(6) -0.009(5) 0.017(4) 0.029(5)
C20 0.084(5) 0.062(5) 0.070(4) 0.013(4) 0.036(4) 0.019(4)
C21 0.068(4) 0.037(3) 0.066(4) 0.017(3) 0.046(4) 0.012(3)
C22 0.064(4) 0.053(4) 0.062(4) -0.006(3) 0.034(3) 0.003(3)
C23 0.059(4) 0.041(4) 0.098(5) -0.002(4) 0.044(4) -0.004(3)
C24 0.043(4) 0.073(5) 0.071(4) -0.016(4) 0.008(3) 0.000(3)
C25 0.064(4) 0.054(4) 0.056(4) -0.014(3) 0.017(3) -0.012(3)
C26 0.067(5) 0.057(4) 0.081(5) -0.001(4) 0.041(4) -0.005(4)
C27 0.138(7) 0.063(5) 0.071(5) -0.003(4) 0.016(5) -0.012(5)
C28 0.068(5) 0.081(5) 0.097(5) -0.006(4) 0.033(4) -0.001(4)
O1 0.051(2) 0.037(2) 0.0345(18) 0.0007(16) 0.0087(16) -0.0004(17)
O2 0.069(3) 0.044(2) 0.057(2) 0.0176(19) 0.043(2) 0.016(2)
O3 0.072(3) 0.068(3) 0.082(3) -0.014(2) 0.021(2) 0.012(3)
O4 0.087(3) 0.073(3) 0.066(3) 0.007(2) 0.028(2) -0.014(3)
O5 0.094(3) 0.048(2) 0.046(2) -0.004(2) 0.011(2) 0.016(2)
O6 0.088(3) 0.070(3) 0.039(2) 0.002(2) 0.002(2) 0.026(2)
O7 0.078(3) 0.076(3) 0.122(4) 0.024(3) 0.070(3) 0.014(3)
 
_geom_special_details
;
 All esds (except the esd in the dihedral angle between two l.s. planes)
 are estimated using the full covariance matrix.  The cell esds are taken
 into account individually in the estimation of esds in distances, angles
 and torsion angles; correlations between esds in cell parameters are only
 used when they are defined by crystal symmetry.  An approximate (isotropic)
 treatment of cell esds is used for estimating esds involving l.s. planes.
;
 
loop_
 _geom_bond_atom_site_label_1
 _geom_bond_atom_site_label_2
 _geom_bond_distance
 _geom_bond_site_symmetry_2
 _geom_bond_publ_flag
Ni1 Ni2 3.3845(10) . ?
Ni1 O1 1.840(3) . ?
Ni1 N1 1.868(4) . ?
Ni1 N8 1.931(4) . ?
Ni1 S2 2.1394(14) . ?
Ni2 O1 1.974(3) . ?
Ni2 N7 2.008(4) . ?
Ni2 O2 2.099(3) . ?
Ni2 N4 2.106(4) . ?
Ni2 N6 2.123(4) . ?
Ni2 N2 2.184(4) . ?
S1 C2 1.776(5) . ?
S1 C1 1.812(6) . ?
S2 C2 1.699(6) . ?
N1 C7 1.301(6) . ?
N1 C8 1.479(5) . ?
N2 C11 1.490(6) . ?
N2 C17 1.467(6) . ?
N2 C10 1.478(6) . ?
N3 C12 1.357(7) . ?
N3 N4 1.373(5) . ?
N3 C11 1.428(6) . ?
N4 C15 1.351(7) . ?
N5 C18 1.338(7) . ?
N5 N6 1.366(6) . ?
N5 C17 1.436(6) . ?
N6 C21 1.321(6) . ?
N7 C23 1.320(7) . ?
N7 N8 1.386(5) . ?
N8 C25 1.327(6) . ?
Cl1 O4 1.335(4) . ?
Cl1 O6 1.351(4) . ?
Cl1 O5 1.435(4) . ?
Cl1 O3 1.408(4) . ?
C2 C3 1.365(7) . ?
C3 C7 1.452(7) . ?
C3 C4 1.520(7) . ?
C4 C5 1.520(7) . ?
C5 C6 1.534(7) . ?
C6 C7 1.525(7) . ?
C8 C9 1.503(7) . ?
C9 O1 1.363(6) . ?
C9 C10 1.477(6) . ?
C12 C14 1.351(8) . ?
C12 C13 1.520(7) . ?
C14 C15 1.399(8) . ?
C15 C16 1.485(8) . ?
C18 C20 1.369(8) . ?
C18 C19 1.480(8) . ?
C20 C21 1.378(8) . ?
C21 C22 1.481(7) . ?
C23 C24 1.369(7) . ?
C24 C25 1.365(8) . ?
C26 O7 1.115(6) . ?
C26 C28 1.401(8) . ?
C26 C27 1.462(8) . ?
 
loop_
 _geom_angle_atom_site_label_1
 _geom_angle_atom_site_label_2
 _geom_angle_atom_site_label_3
 _geom_angle
 _geom_angle_site_symmetry_1
 _geom_angle_site_symmetry_3
 _geom_angle_publ_flag
O1 Ni1 N1 84.75(16) . . ?
O1 Ni1 N8 88.51(16) . . ?
N1 Ni1 N8 172.74(17) . . ?
O1 Ni1 S2 174.34(12) . . ?
N1 Ni1 S2 97.22(13) . . ?
N8 Ni1 S2 89.74(14) . . ?
O1 Ni2 N7 84.31(15) . . ?
O1 Ni2 O2 176.27(13) . . ?
N7 Ni2 O2 98.52(16) . . ?
O1 Ni2 N4 91.73(15) . . ?
N7 Ni2 N4 103.40(17) . . ?
O2 Ni2 N4 85.26(14) . . ?
O1 Ni2 N6 95.19(15) . . ?
N7 Ni2 N6 100.09(17) . . ?
O2 Ni2 N6 86.73(15) . . ?
N4 Ni2 N6 156.05(18) . . ?
O1 Ni2 N2 81.31(14) . . ?
N7 Ni2 N2 165.54(17) . . ?
O2 Ni2 N2 95.91(15) . . ?
N4 Ni2 N2 78.60(16) . . ?
N6 Ni2 N2 79.82(17) . . ?
C2 S1 C1 102.6(3) . . ?
C2 S2 Ni1 111.2(2) . . ?
C7 N1 C8 116.5(4) . . ?
C7 N1 Ni1 131.5(4) . . ?
C8 N1 Ni1 112.0(3) . . ?
C11 N2 C17 110.6(4) . . ?
C11 N2 C10 115.0(4) . . ?
C17 N2 C10 113.2(4) . . ?
C11 N2 Ni2 106.8(3) . . ?
C17 N2 Ni2 104.8(3) . . ?
C10 N2 Ni2 105.6(3) . . ?
C12 N3 N4 110.2(4) . . ?
C12 N3 C11 129.4(5) . . ?
N4 N3 C11 120.0(4) . . ?
C15 N4 N3 105.1(4) . . ?
C15 N4 Ni2 142.2(4) . . ?
N3 N4 Ni2 111.6(3) . . ?
C18 N5 N6 112.2(5) . . ?
C18 N5 C17 128.5(5) . . ?
N6 N5 C17 118.1(4) . . ?
C21 N6 N5 104.8(5) . . ?
C21 N6 Ni2 142.6(4) . . ?
N5 N6 Ni2 109.0(3) . . ?
C23 N7 N8 107.8(5) . . ?
C23 N7 Ni2 131.8(4) . . ?
N8 N7 Ni2 120.3(3) . . ?
C25 N8 N7 106.4(4) . . ?
C25 N8 Ni1 133.0(4) . . ?
N7 N8 Ni1 120.6(3) . . ?
O4 Cl1 O6 113.1(3) . . ?
O4 Cl1 O5 110.2(3) . . ?
O6 Cl1 O5 111.1(2) . . ?
O4 Cl1 O3 103.0(3) . . ?
O6 Cl1 O3 113.9(3) . . ?
O5 Cl1 O3 105.1(3) . . ?
C3 C2 S2 127.2(4) . . ?
C3 C2 S1 114.5(4) . . ?
S2 C2 S1 118.3(4) . . ?
C2 C3 C7 124.5(5) . . ?
C2 C3 C4 126.2(5) . . ?
C7 C3 C4 109.2(5) . . ?
C3 C4 C5 105.2(4) . . ?
C4 C5 C6 105.2(4) . . ?
C7 C6 C5 106.1(4) . . ?
N1 C7 C3 127.1(5) . . ?
N1 C7 C6 125.0(5) . . ?
C3 C7 C6 108.0(5) . . ?
N1 C8 C9 106.0(4) . . ?
O1 C9 C10 111.3(5) . . ?
O1 C9 C8 107.0(4) . . ?
C10 C9 C8 113.9(5) . . ?
C9 C10 N2 110.8(4) . . ?
N3 C11 N2 107.7(4) . . ?
N3 C12 C14 108.5(5) . . ?
N3 C12 C13 119.9(6) . . ?
C14 C12 C13 131.6(6) . . ?
C12 C14 C15 105.8(6) . . ?
N4 C15 C14 110.4(6) . . ?
N4 C15 C16 121.0(6) . . ?
C14 C15 C16 128.5(6) . . ?
N5 C17 N2 107.8(4) . . ?
N5 C18 C20 105.5(6) . . ?
N5 C18 C19 123.2(6) . . ?
C20 C18 C19 131.2(7) . . ?
C18 C20 C21 106.9(6) . . ?
N6 C21 C20 110.6(6) . . ?
N6 C21 C22 120.1(6) . . ?
C20 C21 C22 129.3(5) . . ?
N7 C23 C24 110.2(6) . . ?
C25 C24 C23 104.7(6) . . ?
N8 C25 C24 110.9(6) . . ?
O7 C26 C28 120.4(7) . . ?
O7 C26 C27 122.2(7) . . ?
C28 C26 C27 117.2(6) . . ?
C9 O1 Ni1 114.7(3) . . ?
C9 O1 Ni2 112.2(3) . . ?
Ni1 O1 Ni2 125.03(18) . . ?
 
loop_
 _geom_torsion_atom_site_label_1
 _geom_torsion_atom_site_label_2
 _geom_torsion_atom_site_label_3
 _geom_torsion_atom_site_label_4
 _geom_torsion
 _geom_torsion_site_symmetry_1
 _geom_torsion_site_symmetry_2
 _geom_torsion_site_symmetry_3
 _geom_torsion_site_symmetry_4
 _geom_torsion_publ_flag
O1 Ni1 S2 C2 120.0(12) . . . . ?
N1 Ni1 S2 C2 9.9(2) . . . . ?
N8 Ni1 S2 C2 -168.1(2) . . . . ?
O1 Ni1 N1 C7 176.0(5) . . . . ?
N8 Ni1 N1 C7 154.3(12) . . . . ?
S2 Ni1 N1 C7 -9.3(4) . . . . ?
O1 Ni1 N1 C8 -5.6(3) . . . . ?
N8 Ni1 N1 C8 -27.3(15) . . . . ?
S2 Ni1 N1 C8 169.1(3) . . . . ?
O1 Ni2 N2 C11 -120.7(3) . . . . ?
N7 Ni2 N2 C11 -126.7(6) . . . . ?
O2 Ni2 N2 C11 56.8(3) . . . . ?
N4 Ni2 N2 C11 -27.2(3) . . . . ?
N6 Ni2 N2 C11 142.4(3) . . . . ?
O1 Ni2 N2 C17 122.0(3) . . . . ?
N7 Ni2 N2 C17 116.0(6) . . . . ?
O2 Ni2 N2 C17 -60.5(3) . . . . ?
N4 Ni2 N2 C17 -144.5(3) . . . . ?
N6 Ni2 N2 C17 25.1(3) . . . . ?
O1 Ni2 N2 C10 2.1(3) . . . . ?
N7 Ni2 N2 C10 -3.8(8) . . . . ?
O2 Ni2 N2 C10 179.6(3) . . . . ?
N4 Ni2 N2 C10 95.7(3) . . . . ?
N6 Ni2 N2 C10 -94.8(3) . . . . ?
C12 N3 N4 C15 -0.9(6) . . . . ?
C11 N3 N4 C15 -174.7(5) . . . . ?
C12 N3 N4 Ni2 -171.7(3) . . . . ?
C11 N3 N4 Ni2 14.5(5) . . . . ?
O1 Ni2 N4 C15 -76.3(6) . . . . ?
N7 Ni2 N4 C15 8.2(6) . . . . ?
O2 Ni2 N4 C15 105.9(6) . . . . ?
N6 Ni2 N4 C15 176.7(5) . . . . ?
N2 Ni2 N4 C15 -157.1(6) . . . . ?
O1 Ni2 N4 N3 89.1(3) . . . . ?
N7 Ni2 N4 N3 173.7(3) . . . . ?
O2 Ni2 N4 N3 -88.7(3) . . . . ?
N6 Ni2 N4 N3 -17.8(6) . . . . ?
N2 Ni2 N4 N3 8.3(3) . . . . ?
C18 N5 N6 C21 1.6(6) . . . . ?
C17 N5 N6 C21 169.8(4) . . . . ?
C18 N5 N6 Ni2 165.3(4) . . . . ?
C17 N5 N6 Ni2 -26.4(5) . . . . ?
O1 Ni2 N6 C21 72.4(6) . . . . ?
N7 Ni2 N6 C21 -12.7(6) . . . . ?
O2 Ni2 N6 C21 -110.8(6) . . . . ?
N4 Ni2 N6 C21 178.6(5) . . . . ?
N2 Ni2 N6 C21 152.6(6) . . . . ?
O1 Ni2 N6 N5 -81.1(3) . . . . ?
N7 Ni2 N6 N5 -166.2(3) . . . . ?
O2 Ni2 N6 N5 95.7(3) . . . . ?
N4 Ni2 N6 N5 25.1(6) . . . . ?
N2 Ni2 N6 N5 -0.9(3) . . . . ?
O1 Ni2 N7 C23 -174.3(5) . . . . ?
O2 Ni2 N7 C23 8.2(5) . . . . ?
N4 Ni2 N7 C23 95.3(5) . . . . ?
N6 Ni2 N7 C23 -80.0(5) . . . . ?
N2 Ni2 N7 C23 -168.3(5) . . . . ?
O1 Ni2 N7 N8 6.4(3) . . . . ?
O2 Ni2 N7 N8 -171.1(3) . . . . ?
N4 Ni2 N7 N8 -84.0(4) . . . . ?
N6 Ni2 N7 N8 100.7(3) . . . . ?
N2 Ni2 N7 N8 12.3(8) . . . . ?
C23 N7 N8 C25 -2.4(5) . . . . ?
Ni2 N7 N8 C25 177.0(3) . . . . ?
C23 N7 N8 Ni1 179.6(3) . . . . ?
Ni2 N7 N8 Ni1 -0.9(5) . . . . ?
O1 Ni1 N8 C25 177.1(5) . . . . ?
N1 Ni1 N8 C25 -161.2(12) . . . . ?
S2 Ni1 N8 C25 2.5(5) . . . . ?
O1 Ni1 N8 N7 -5.6(3) . . . . ?
N1 Ni1 N8 N7 16.1(15) . . . . ?
S2 Ni1 N8 N7 179.8(3) . . . . ?
Ni1 S2 C2 C3 -5.6(6) . . . . ?
Ni1 S2 C2 S1 172.2(2) . . . . ?
C1 S1 C2 C3 -165.4(4) . . . . ?
C1 S1 C2 S2 16.6(4) . . . . ?
S2 C2 C3 C7 -4.4(8) . . . . ?
S1 C2 C3 C7 177.8(4) . . . . ?
S2 C2 C3 C4 178.1(4) . . . . ?
S1 C2 C3 C4 0.2(7) . . . . ?
C2 C3 C4 C5 158.8(5) . . . . ?
C7 C3 C4 C5 -19.1(6) . . . . ?
C3 C4 C5 C6 25.2(6) . . . . ?
C4 C5 C6 C7 -22.5(6) . . . . ?
C8 N1 C7 C3 -177.3(5) . . . . ?
Ni1 N1 C7 C3 1.1(8) . . . . ?
C8 N1 C7 C6 4.1(7) . . . . ?
Ni1 N1 C7 C6 -177.6(4) . . . . ?
C2 C3 C7 N1 8.2(9) . . . . ?
C4 C3 C7 N1 -173.9(5) . . . . ?
C2 C3 C7 C6 -173.0(5) . . . . ?
C4 C3 C7 C6 4.9(6) . . . . ?
C5 C6 C7 N1 -170.1(5) . . . . ?
C5 C6 C7 C3 11.0(6) . . . . ?
C7 N1 C8 C9 -154.8(4) . . . . ?
Ni1 N1 C8 C9 26.6(5) . . . . ?
N1 C8 C9 O1 -40.8(6) . . . . ?
N1 C8 C9 C10 -164.2(5) . . . . ?
O1 C9 C10 N2 47.1(6) . . . . ?
C8 C9 C10 N2 168.1(4) . . . . ?
C11 N2 C10 C9 92.3(5) . . . . ?
C17 N2 C10 C9 -139.3(5) . . . . ?
Ni2 N2 C10 C9 -25.2(5) . . . . ?
C12 N3 C11 N2 149.0(5) . . . . ?
N4 N3 C11 N2 -38.6(6) . . . . ?
C17 N2 C11 N3 154.3(5) . . . . ?
C10 N2 C11 N3 -75.9(6) . . . . ?
Ni2 N2 C11 N3 40.9(5) . . . . ?
N4 N3 C12 C14 -0.1(6) . . . . ?
C11 N3 C12 C14 173.0(6) . . . . ?
N4 N3 C12 C13 -178.3(5) . . . . ?
C11 N3 C12 C13 -5.2(9) . . . . ?
N3 C12 C14 C15 1.0(7) . . . . ?
C13 C12 C14 C15 178.9(6) . . . . ?
N3 N4 C15 C14 1.5(6) . . . . ?
Ni2 N4 C15 C14 167.5(5) . . . . ?
N3 N4 C15 C16 179.5(5) . . . . ?
Ni2 N4 C15 C16 -14.5(9) . . . . ?
C12 C14 C15 N4 -1.6(7) . . . . ?
C12 C14 C15 C16 -179.4(6) . . . . ?
C18 N5 C17 N2 -143.7(6) . . . . ?
N6 N5 C17 N2 50.3(6) . . . . ?
C11 N2 C17 N5 -159.0(5) . . . . ?
C10 N2 C17 N5 70.3(5) . . . . ?
Ni2 N2 C17 N5 -44.3(5) . . . . ?
N6 N5 C18 C20 -1.1(6) . . . . ?
C17 N5 C18 C20 -167.8(5) . . . . ?
N6 N5 C18 C19 179.9(6) . . . . ?
C17 N5 C18 C19 13.2(10) . . . . ?
N5 C18 C20 C21 0.1(7) . . . . ?
C19 C18 C20 C21 179.0(7) . . . . ?
N5 N6 C21 C20 -1.5(6) . . . . ?
Ni2 N6 C21 C20 -155.6(5) . . . . ?
N5 N6 C21 C22 179.4(4) . . . . ?
Ni2 N6 C21 C22 25.3(9) . . . . ?
C18 C20 C21 N6 0.9(7) . . . . ?
C18 C20 C21 C22 179.9(5) . . . . ?
N8 N7 C23 C24 1.4(6) . . . . ?
Ni2 N7 C23 C24 -177.9(4) . . . . ?
N7 C23 C24 C25 0.1(7) . . . . ?
N7 N8 C25 C24 2.5(6) . . . . ?
Ni1 N8 C25 C24 -179.9(4) . . . . ?
C23 C24 C25 N8 -1.7(7) . . . . ?
C10 C9 O1 Ni1 164.3(4) . . . . ?
C8 C9 O1 Ni1 39.3(5) . . . . ?
C10 C9 O1 Ni2 -45.4(5) . . . . ?
C8 C9 O1 Ni2 -170.3(3) . . . . ?
N1 Ni1 O1 C9 -20.1(4) . . . . ?
N8 Ni1 O1 C9 157.2(4) . . . . ?
S2 Ni1 O1 C9 -130.8(11) . . . . ?
N1 Ni1 O1 Ni2 -166.1(2) . . . . ?
N8 Ni1 O1 Ni2 11.2(2) . . . . ?
S2 Ni1 O1 Ni2 83.2(12) . . . . ?
N7 Ni2 O1 C9 -158.1(4) . . . . ?
O2 Ni2 O1 C9 -19(2) . . . . ?
N4 Ni2 O1 C9 -54.8(4) . . . . ?
N6 Ni2 O1 C9 102.3(4) . . . . ?
N2 Ni2 O1 C9 23.4(3) . . . . ?
N7 Ni2 O1 Ni1 -11.3(2) . . . . ?
O2 Ni2 O1 Ni1 128(2) . . . . ?
N4 Ni2 O1 Ni1 92.0(2) . . . . ?
N6 Ni2 O1 Ni1 -111.0(2) . . . . ?
N2 Ni2 O1 Ni1 170.2(2) . . . . ?
 
loop_
 _geom_hbond_atom_site_label_D
 _geom_hbond_atom_site_label_H
 _geom_hbond_atom_site_label_A
 _geom_hbond_distance_DH
 _geom_hbond_distance_HA
 _geom_hbond_distance_DA
 _geom_hbond_angle_DHA
 _geom_hbond_site_symmetry_A
 
 Specified hydrogen bonds (with esds except fixed and riding H)
 
  D-H          H...A        D...A        <(DHA)
 
 ** No suitable H-bond found for O2...O7 = 2.671(5) A **
 ** No suitable H-bond found for O2...O5 = 2.728(5) A **
 
 
 Least-squares planes (x,y,z in crystal coordinates) and deviations from them
 (* indicates atom used to define plane)
 
 - 20.2490 (0.0135) x + 3.4661 (0.0158) y + 6.6131 (0.0126) z = 3.3510 (0.0125)
 
 *   -0.0651 (0.0016)  N1
 *    0.0735 (0.0018)  O1
 *   -0.0648 (0.0016)  N8
 *    0.0564 (0.0014)  S2
     -0.0267 (0.0018)  Ni1
     -0.2051 (0.0065)  C7
      0.1337 (0.0067)  C8
     -0.3504 (0.0071)  C9
     -0.2121 (0.0044)  Ni2
     -0.1293 (0.0061)  N7
     -0.0872 (0.0072)  C25
     -0.2158 (0.0062)  C2
 
 Rms deviation of fitted atoms =   0.0652
 
 
 - 20.2498 (0.0135) x + 3.4651 (0.0158) y + 6.6125 (0.0126) z = 3.3446 (0.0124)
 
 Angle to previous plane (with approximate esd) =  0.01 ( 0.13 )
 
 *   -0.0596 (0.0018)  N1
 *    0.0790 (0.0018)  O1
 *   -0.0596 (0.0018)  N8
 *    0.0616 (0.0013)  S2
 *   -0.0214 (0.0014)  Ni1
     -0.1995 (0.0064)  C7
      0.1393 (0.0066)  C8
     -0.3448 (0.0070)  C9
     -0.2068 (0.0042)  Ni2
     -0.1242 (0.0060)  N7
     -0.0822 (0.0072)  C25
     -0.2105 (0.0062)  C2
 
 Rms deviation of fitted atoms =   0.0593
 
 
  7.1426 (0.0298) x + 8.5829 (0.0117) y - 9.9597 (0.0181) z = 5.0592 (0.0130)
 
 Angle to previous plane (with approximate esd) = 79.91 ( 0.11 )
 
 *    0.1988 (0.0021)  N4
 *   -0.2309 (0.0024)  N2
 *    0.1993 (0.0021)  N6
 *   -0.1672 (0.0019)  N7
      0.0649 (0.0022)  Ni2
     -1.9084 (0.0038)  O1
      2.1625 (0.0039)  O2
      0.0644 (0.0076)  C15
      0.2229 (0.0061)  N3
      0.4706 (0.0075)  C11
      0.4254 (0.0072)  C17
      0.0560 (0.0064)  N5
      0.0071 (0.0072)  C21
      0.6997 (0.0080)  C23
     -1.4242 (0.0059)  N8
     -2.9795 (0.0037)  Ni1
     -2.3890 (0.0059)  C9
     -1.6954 (0.0062)  C10
 
 Rms deviation of fitted atoms =   0.2003
 
 
  7.1306 (0.0298) x + 8.5751 (0.0117) y - 9.9754 (0.0180) z = 5.0611 (0.0130)
 
 Angle to previous plane (with approximate esd) =  0.09 ( 0.22 )
 
 *    0.1859 (0.0021)  N4
 *   -0.2409 (0.0024)  N2
 *    0.1869 (0.0022)  N6
 *   -0.1835 (0.0019)  N7
 *    0.0516 (0.0018)  Ni2
     -1.9217 (0.0036)  O1
      2.1493 (0.0037)  O2
      0.0505 (0.0075)  C15
      0.2121 (0.0060)  N3
      0.4613 (0.0075)  C11
      0.4163 (0.0071)  C17
      0.0456 (0.0063)  N5
     -0.0060 (0.0071)  C21
      0.6819 (0.0078)  C23
     -1.4414 (0.0057)  N8
     -2.9950 (0.0034)  Ni1
     -2.4006 (0.0058)  C9
     -1.7051 (0.0062)  C10
 
 Rms deviation of fitted atoms =   0.1810
 
 
  6.6121 (0.0328) x + 5.6932 (0.0134) y + 10.6402 (0.0154) z = 7.6689 (0.0098)
 
 Angle to previous plane (with approximate esd) = 89.37 ( 0.10 )
 
 *    0.1766 (0.0020)  O1
 *    0.1905 (0.0021)  O2
 *   -0.1882 (0.0021)  N4
 *   -0.1789 (0.0020)  N6
      0.2324 (0.0021)  Ni2
     -1.9354 (0.0045)  N2
      2.2228 (0.0049)  N7
      0.3791 (0.0083)  C15
     -1.5401 (0.0054)  N3
     -2.4469 (0.0063)  C11
     -2.4035 (0.0061)  C17
     -1.5243 (0.0055)  N5
      0.3566 (0.0090)  C21
      3.2171 (0.0071)  C23
      2.7698 (0.0051)  N8
      1.6317 (0.0043)  Ni1
     -0.9938 (0.0060)  C9
     -2.1561 (0.0057)  C10
 
 Rms deviation of fitted atoms =   0.1836
 
 
  6.6363 (0.0329) x + 5.7108 (0.0135) y + 10.6147 (0.0155) z = 7.7255 (0.0098)
 
 Angle to previous plane (with approximate esd) =  0.13 ( 0.22 )
 
 *    0.1254 (0.0019)  O1
 *    0.1487 (0.0020)  O2
 *   -0.2337 (0.0023)  N4
 *   -0.2261 (0.0022)  N6
 *    0.1858 (0.0017)  Ni2
     -1.9827 (0.0044)  N2
      2.1755 (0.0047)  N7
      0.3338 (0.0083)  C15
     -1.5854 (0.0054)  N3
     -2.4920 (0.0062)  C11
     -2.4497 (0.0060)  C17
     -1.5719 (0.0054)  N5
      0.3085 (0.0089)  C21
      3.1717 (0.0069)  C23
      2.7196 (0.0049)  N8
      1.5781 (0.0041)  Ni1
     -1.0459 (0.0059)  C9
     -2.2067 (0.0056)  C10
 
 Rms deviation of fitted atoms =   0.1887
 
 
_diffrn_measured_fraction_theta_max    0.850
_diffrn_reflns_theta_full              24.97
_diffrn_measured_fraction_theta_full   0.850
_refine_diff_density_max    0.520
_refine_diff_density_min   -0.355
_refine_diff_density_rms    0.071


##############################################################################
data_compound 4
 
_audit_creation_method            SHELXL-97
_chemical_name_systematic
;
 ?
;
_chemical_name_common             ?
_chemical_melting_point           ?
_chemical_formula_moiety          'C51 H56 B1 N7 Ni2 O S3'
_chemical_formula_sum             'C51 H56 B1 N7 Ni2 O S3'
_chemical_formula_weight          1007.44
 
loop_
 _atom_type_symbol
 _atom_type_description
 _atom_type_scat_dispersion_real
 _atom_type_scat_dispersion_imag
 _atom_type_scat_source
 'C'  'C'   0.0033   0.0016
 'International Tables Vol C Tables 4.2.6.8 and 6.1.1.4'
 'H'  'H'   0.0000   0.0000
 'International Tables Vol C Tables 4.2.6.8 and 6.1.1.4'
 'B'  'B'   0.0013   0.0007
 'International Tables Vol C Tables 4.2.6.8 and 6.1.1.4'
 'N'  'N'   0.0061   0.0033
 'International Tables Vol C Tables 4.2.6.8 and 6.1.1.4'
 'Ni'  'Ni'   0.3393   1.1124
 'International Tables Vol C Tables 4.2.6.8 and 6.1.1.4'
 'S'  'S'   0.1246   0.1234
 'International Tables Vol C Tables 4.2.6.8 and 6.1.1.4'
 'O'  'O'   0.0106   0.0060
 'International Tables Vol C Tables 4.2.6.8 and 6.1.1.4'
 
_symmetry_cell_setting            monoclinic
_symmetry_space_group_name_H-M    'P 21/n'
 
loop_
 _symmetry_equiv_pos_as_xyz
 'x, y, z'
 '-x+1/2, y+1/2, -z+1/2'
 '-x, -y, -z'
 'x-1/2, -y-1/2, z-1/2'
 
_cell_length_a                    10.0522(8)
_cell_length_b                    19.691(3)
_cell_length_c                    25.117(5)
_cell_angle_alpha                 90.00
_cell_angle_beta                  91.901(10)
_cell_angle_gamma                 90.00
_cell_volume                      4969.0(13)
_cell_formula_units_Z             4
_cell_measurement_temperature     293(2)
_cell_measurement_reflns_used     25
_cell_measurement_theta_min       11.338
_cell_measurement_theta_max       12.566
 
_exptl_crystal_description        plate
_exptl_crystal_colour             black
_exptl_crystal_size_max           0.46
_exptl_crystal_size_mid           0.36
_exptl_crystal_size_min           0.20
_exptl_crystal_density_meas       ?
_exptl_crystal_density_diffrn     1.347
_exptl_crystal_density_method     'not measured'
_exptl_crystal_F_000              2112
_exptl_absorpt_coefficient_mu     0.928
_exptl_absorpt_correction_type    psi-scan
_exptl_absorpt_correction_T_min   0.6736
_exptl_absorpt_correction_T_max   0.8375
_exptl_absorpt_process_details    ?
 
_exptl_special_details
;
 ?
;
 
_diffrn_ambient_temperature       293(2)
_diffrn_radiation_wavelength      0.71073
_diffrn_radiation_type            MoK\a
_diffrn_radiation_source          'fine-focus sealed tube'
_diffrn_radiation_monochromator   graphite
_diffrn_measurement_device_type   'Enraf Nonius CAD4'
_diffrn_measurement_method        'non-profiled omega/2theta scans'
_diffrn_detector_area_resol_mean  ?
_diffrn_standards_number          3
_diffrn_standards_interval_count  ?
_diffrn_standards_interval_time   300
_diffrn_standards_decay_%         1
_diffrn_reflns_number             8914
_diffrn_reflns_av_R_equivalents   0.0398
_diffrn_reflns_av_sigmaI/netI     0.0854
_diffrn_reflns_limit_h_min        -11
_diffrn_reflns_limit_h_max        11
_diffrn_reflns_limit_k_min        0
_diffrn_reflns_limit_k_max        23
_diffrn_reflns_limit_l_min        0
_diffrn_reflns_limit_l_max        29
_diffrn_reflns_theta_min          2.07
_diffrn_reflns_theta_max          24.98
_reflns_number_total              8707
_reflns_number_gt                 5139
_reflns_threshold_expression      >2sigma(I)
 
_computing_data_collection        'CAD4 Express (Enraf Nonius, 1994)'
_computing_cell_refinement        'CAD4 Express (Enraf Nonius, 1994)'
_computing_data_reduction         'XCAD4 (Harms & Wocadlo, 1995)'
_computing_structure_solution     'SHELXL-97 (Sheldrick, 1997)'
_computing_structure_refinement   'SHELXL-97 (Sheldrick, 1997)'
_computing_molecular_graphics     'Ortep-3 for Windows (Farrugia, 1997)'
_computing_publication_material   'WinGX publication routines (Farrugia, 1998)'
 
_refine_special_details
;
 Refinement of F^2^ against ALL reflections.  The weighted R-factor wR and
 goodness of fit S are based on F^2^, conventional R-factors R are based
 on F, with F set to zero for negative F^2^. The threshold expression of
 F^2^ > 2sigma(F^2^) is used only for calculating R-factors(gt) etc. and is
 not relevant to the choice of reflections for refinement.  R-factors based
 on F^2^ are statistically about twice as large as those based on F, and R-
 factors based on ALL data will be even larger.
;
 
_refine_ls_structure_factor_coef  Fsqd
_refine_ls_matrix_type            full
_refine_ls_weighting_scheme       calc
_refine_ls_weighting_details
 'calc w=1/[\s^2^(Fo^2^)+(0.0584P)^2^+3.3440P] where P=(Fo^2^+2Fc^2^)/3'
_atom_sites_solution_primary      direct
_atom_sites_solution_secondary    difmap
_atom_sites_solution_hydrogens    geom
_refine_ls_hydrogen_treatment     mixed
_refine_ls_extinction_method      none
_refine_ls_extinction_coef        ?
_refine_ls_number_reflns          8707
_refine_ls_number_parameters      586
_refine_ls_number_restraints      0
_refine_ls_R_factor_all           0.1266
_refine_ls_R_factor_gt            0.0612
_refine_ls_wR_factor_ref          0.1495
_refine_ls_wR_factor_gt           0.1248
_refine_ls_goodness_of_fit_ref    1.010
_refine_ls_restrained_S_all       1.010
_refine_ls_shift/su_max           0.000
_refine_ls_shift/su_mean          0.000
 
loop_
 _atom_site_label
 _atom_site_type_symbol
 _atom_site_fract_x
 _atom_site_fract_y
 _atom_site_fract_z
 _atom_site_U_iso_or_equiv
 _atom_site_adp_type
 _atom_site_occupancy
 _atom_site_symmetry_multiplicity
 _atom_site_calc_flag
 _atom_site_refinement_flags
 _atom_site_disorder_assembly
 _atom_site_disorder_group
Ni1 Ni 0.14473(6) 0.11666(3) 0.06095(3) 0.0402(2) Uani 1 1 d . . .
Ni2 Ni 0.08947(7) 0.27600(3) 0.06427(3) 0.0423(2) Uani 1 1 d . . .
S1 S 0.35891(15) -0.10118(8) 0.08187(8) 0.0659(5) Uani 1 1 d . . .
S2 S 0.30321(13) 0.04591(7) 0.06764(6) 0.0483(4) Uani 1 1 d . . .
S3 S 0.29719(14) 0.19797(7) 0.07068(6) 0.0500(4) Uani 1 1 d . . .
B B -0.2589(6) 0.5211(3) 0.2261(3) 0.0480(16) Uani 1 1 d . . .
O1 O 0.0157(3) 0.18397(16) 0.04485(13) 0.0412(9) Uani 1 1 d . . .
N1 N 0.0032(4) 0.0574(2) 0.07040(16) 0.0391(10) Uani 1 1 d . . .
N2 N -0.0112(4) 0.2587(2) 0.13622(16) 0.0433(11) Uani 1 1 d . . .
N3 N -0.1742(5) 0.3197(2) 0.08574(18) 0.0479(12) Uani 1 1 d . . .
N4 N -0.0939(4) 0.3202(2) 0.04308(18) 0.0475(11) Uani 1 1 d . . .
N5 N 0.1703(4) 0.3273(2) 0.16744(19) 0.0515(12) Uani 1 1 d . . .
N6 N 0.1805(4) 0.3468(2) 0.11541(17) 0.0450(11) Uani 1 1 d . . .
N7 N 0.2079(4) 0.2857(2) -0.00090(17) 0.0472(11) Uani 1 1 d . . .
C1 C 0.5178(5) -0.0610(3) 0.0777(3) 0.0694(18) Uani 1 1 d . . .
HC1A H 0.5867 -0.0946 0.0808 0.104 Uiso 1 1 calc R . .
HC1B H 0.5289 -0.0285 0.1061 0.104 Uiso 1 1 calc R . .
HC1C H 0.5230 -0.0382 0.0441 0.104 Uiso 1 1 calc R . .
C2 C 0.2413(5) -0.0343(2) 0.0756(2) 0.0423(13) Uani 1 1 d . . .
C3 C 0.1114(5) -0.0533(3) 0.0798(2) 0.0409(13) Uani 1 1 d . . .
C4 C 0.0647(6) -0.1251(3) 0.0874(3) 0.0592(16) Uani 1 1 d . . .
HC4A H 0.0892 -0.1532 0.0576 0.071 Uiso 1 1 calc R . .
HC4B H 0.1041 -0.1442 0.1199 0.071 Uiso 1 1 calc R . .
C5 C -0.0835(6) -0.1213(3) 0.0908(3) 0.079(2) Uani 1 1 d . . .
HC5A H -0.1254 -0.1501 0.0638 0.094 Uiso 1 1 calc R . .
HC5B H -0.1103 -0.1369 0.1254 0.094 Uiso 1 1 calc R . .
C6 C -0.1257(5) -0.0491(3) 0.0824(2) 0.0522(15) Uani 1 1 d . . .
HC6A H -0.1744 -0.0330 0.1126 0.063 Uiso 1 1 calc R . .
HC6B H -0.1825 -0.0451 0.0506 0.063 Uiso 1 1 calc R . .
C7 C -0.0002(5) -0.0087(3) 0.07660(19) 0.0411(13) Uani 1 1 d . . .
C8 C -0.1263(5) 0.0936(3) 0.0685(2) 0.0482(14) Uani 1 1 d . . .
HC8A H -0.1814 0.0780 0.0970 0.058 Uiso 1 1 calc R . .
HC8B H -0.1731 0.0852 0.0348 0.058 Uiso 1 1 calc R . .
C9 C -0.0972(5) 0.1691(3) 0.0749(2) 0.0448(13) Uani 1 1 d . . .
HC9 H -0.1734 0.1953 0.0608 0.054 Uiso 1 1 calc R . .
C10 C -0.0693(5) 0.1888(3) 0.1333(2) 0.0446(14) Uani 1 1 d . . .
H10A H -0.1514 0.1874 0.1525 0.054 Uiso 1 1 calc R . .
H10B H -0.0076 0.1566 0.1498 0.054 Uiso 1 1 calc R . .
C11 C -0.1126(5) 0.3123(3) 0.1381(2) 0.0526(15) Uani 1 1 d . . .
H11A H -0.1792 0.3003 0.1636 0.063 Uiso 1 1 calc R . .
H11B H -0.0717 0.3548 0.1493 0.063 Uiso 1 1 calc R . .
C12 C -0.3044(6) 0.3222(3) 0.0710(3) 0.0575(16) Uani 1 1 d . . .
C13 C -0.4133(5) 0.3220(3) 0.1094(3) 0.073(2) Uani 1 1 d . . .
H13A H -0.3760 0.3198 0.1451 0.109 Uiso 1 1 calc R . .
H13B H -0.4696 0.2834 0.1028 0.109 Uiso 1 1 calc R . .
H13C H -0.4647 0.3629 0.1052 0.109 Uiso 1 1 calc R . .
C14 C -0.3065(6) 0.3247(3) 0.0160(3) 0.0634(17) Uani 1 1 d . . .
HC14 H -0.3818 0.3275 -0.0064 0.076 Uiso 1 1 calc R . .
C15 C -0.1757(6) 0.3221(3) 0.0003(3) 0.0565(16) Uani 1 1 d . . .
C16 C -0.1284(7) 0.3224(4) -0.0556(3) 0.085(2) Uani 1 1 d . . .
H16A H -0.0330 0.3198 -0.0550 0.128 Uiso 1 1 calc R . .
H16B H -0.1566 0.3636 -0.0731 0.128 Uiso 1 1 calc R . .
H16C H -0.1651 0.2841 -0.0746 0.128 Uiso 1 1 calc R . .
C17 C 0.0913(5) 0.2674(3) 0.1796(2) 0.0496(14) Uani 1 1 d . . .
H17A H 0.0490 0.2733 0.2134 0.060 Uiso 1 1 calc R . .
H17B H 0.1479 0.2276 0.1819 0.060 Uiso 1 1 calc R . .
C18 C 0.2424(6) 0.3684(3) 0.2003(2) 0.0562(16) Uani 1 1 d . . .
C19 C 0.2548(7) 0.3565(4) 0.2596(2) 0.086(2) Uani 1 1 d . . .
H19A H 0.2002 0.3186 0.2689 0.129 Uiso 1 1 calc R . .
H19B H 0.2261 0.3963 0.2780 0.129 Uiso 1 1 calc R . .
H19C H 0.3460 0.3469 0.2695 0.129 Uiso 1 1 calc R . .
C20 C 0.2996(6) 0.4155(3) 0.1686(3) 0.0625(17) Uani 1 1 d . . .
HC20 H 0.3551 0.4508 0.1797 0.075 Uiso 1 1 calc R . .
C21 C 0.2594(5) 0.4007(3) 0.1164(2) 0.0494(14) Uani 1 1 d . . .
C22 C 0.2950(6) 0.4366(3) 0.0667(2) 0.0698(19) Uani 1 1 d . . .
H22A H 0.2515 0.4149 0.0366 0.105 Uiso 1 1 calc R . .
H22B H 0.3897 0.4348 0.0629 0.105 Uiso 1 1 calc R . .
H22C H 0.2669 0.4831 0.0685 0.105 Uiso 1 1 calc R . .
C23 C 0.2115(7) 0.3222(3) -0.0456(2) 0.0624(17) Uani 1 1 d . . .
HC23 H 0.1476 0.3558 -0.0513 0.075 Uiso 1 1 calc R . .
C24 C 0.3045(8) 0.3126(4) -0.0833(3) 0.079(2) Uani 1 1 d . . .
HC24 H 0.3029 0.3382 -0.1144 0.094 Uiso 1 1 calc R . .
C25 C 0.4012(8) 0.2637(4) -0.0738(3) 0.080(2) Uani 1 1 d . . .
HC25 H 0.4658 0.2558 -0.0988 0.096 Uiso 1 1 calc R . .
C26 C 0.4011(6) 0.2274(3) -0.0280(3) 0.0617(17) Uani 1 1 d . . .
HC26 H 0.4669 0.1950 -0.0210 0.074 Uiso 1 1 calc R . .
C27 C 0.3034(5) 0.2385(3) 0.0083(2) 0.0459(14) Uani 1 1 d . . .
C28 C -0.2350(6) 0.4446(3) 0.2515(2) 0.0504(14) Uani 1 1 d . . .
C29 C -0.1198(6) 0.4234(3) 0.2789(2) 0.0619(17) Uani 1 1 d . . .
HC29 H -0.0529 0.4549 0.2864 0.074 Uiso 1 1 calc R . .
C30 C -0.1014(7) 0.3562(4) 0.2956(3) 0.075(2) Uani 1 1 d . . .
HC30 H -0.0231 0.3440 0.3139 0.090 Uiso 1 1 calc R . .
C31 C -0.1968(9) 0.3080(4) 0.2853(3) 0.077(2) Uani 1 1 d . . .
HC31 H -0.1844 0.2634 0.2965 0.093 Uiso 1 1 calc R . .
C32 C -0.3117(8) 0.3272(3) 0.2581(3) 0.078(2) Uani 1 1 d . . .
HC32 H -0.3785 0.2956 0.2508 0.094 Uiso 1 1 calc R . .
C33 C -0.3275(6) 0.3940(3) 0.2416(2) 0.0623(17) Uani 1 1 d . . .
HC33 H -0.4053 0.4054 0.2226 0.075 Uiso 1 1 calc R . .
C34 C -0.4099(6) 0.5475(3) 0.2382(2) 0.0505(15) Uani 1 1 d . . .
C35 C -0.4903(6) 0.5220(3) 0.2777(2) 0.0560(16) Uani 1 1 d . . .
HC35 H -0.4567 0.4868 0.2989 0.067 Uiso 1 1 calc R . .
C36 C -0.6164(7) 0.5457(4) 0.2874(3) 0.074(2) Uani 1 1 d . . .
HC36 H -0.6653 0.5265 0.3144 0.088 Uiso 1 1 calc R . .
C37 C -0.6685(7) 0.5968(4) 0.2577(3) 0.082(2) Uani 1 1 d . . .
HC37 H -0.7547 0.6118 0.2632 0.098 Uiso 1 1 calc R . .
C38 C -0.5947(8) 0.6266(4) 0.2194(3) 0.097(3) Uani 1 1 d . . .
HC38 H -0.6296 0.6624 0.1992 0.116 Uiso 1 1 calc R . .
C39 C -0.4649(7) 0.6025(3) 0.2107(3) 0.075(2) Uani 1 1 d . . .
HC39 H -0.4142 0.6244 0.1856 0.090 Uiso 1 1 calc R . .
C40 C -0.1572(5) 0.5778(3) 0.2528(2) 0.0485(14) Uani 1 1 d . . .
C41 C -0.1374(6) 0.5825(3) 0.3080(2) 0.0620(17) Uani 1 1 d . . .
HC41 H -0.1813 0.5521 0.3296 0.074 Uiso 1 1 calc R . .
C42 C -0.0542(7) 0.6311(4) 0.3317(3) 0.076(2) Uani 1 1 d . . .
HC42 H -0.0432 0.6322 0.3686 0.091 Uiso 1 1 calc R . .
C43 C 0.0109(7) 0.6768(4) 0.3017(4) 0.077(2) Uani 1 1 d . . .
HC43 H 0.0663 0.7092 0.3178 0.092 Uiso 1 1 calc R . .
C44 C -0.0063(6) 0.6744(3) 0.2473(3) 0.0695(19) Uani 1 1 d . . .
HC44 H 0.0376 0.7056 0.2263 0.083 Uiso 1 1 calc R . .
C45 C -0.0886(6) 0.6259(3) 0.2233(3) 0.0577(16) Uani 1 1 d . . .
HC45 H -0.0985 0.6254 0.1864 0.069 Uiso 1 1 calc R . .
C46 C -0.2322(6) 0.5114(3) 0.1627(2) 0.0497(14) Uani 1 1 d . . .
C47 C -0.3316(6) 0.5075(3) 0.1224(2) 0.0593(16) Uani 1 1 d . . .
HC47 H -0.4202 0.5123 0.1312 0.071 Uiso 1 1 calc R . .
C48 C -0.3012(8) 0.4967(3) 0.0696(3) 0.0695(19) Uani 1 1 d . . .
HC48 H -0.3692 0.4961 0.0436 0.083 Uiso 1 1 calc R . .
C49 C -0.1728(9) 0.4869(3) 0.0553(3) 0.075(2) Uani 1 1 d . . .
HC49 H -0.1535 0.4790 0.0199 0.090 Uiso 1 1 calc R . .
C50 C -0.0737(8) 0.4890(3) 0.0933(3) 0.074(2) Uani 1 1 d . . .
HC50 H 0.0140 0.4823 0.0838 0.089 Uiso 1 1 calc R . .
C51 C -0.1023(6) 0.5010(3) 0.1466(2) 0.0610(17) Uani 1 1 d . . .
HC51 H -0.0328 0.5021 0.1719 0.073 Uiso 1 1 calc R . .
 
loop_
 _atom_site_aniso_label
 _atom_site_aniso_U_11
 _atom_site_aniso_U_22
 _atom_site_aniso_U_33
 _atom_site_aniso_U_23
 _atom_site_aniso_U_13
 _atom_site_aniso_U_12
Ni1 0.0370(4) 0.0362(4) 0.0476(4) 0.0019(3) 0.0073(3) -0.0002(3)
Ni2 0.0444(4) 0.0393(4) 0.0435(4) 0.0017(3) 0.0064(3) 0.0026(3)
S1 0.0485(9) 0.0446(9) 0.1047(14) 0.0009(9) 0.0023(9) 0.0077(7)
S2 0.0384(8) 0.0388(8) 0.0682(10) 0.0035(7) 0.0086(7) 0.0005(6)
S3 0.0437(9) 0.0418(8) 0.0643(10) 0.0088(7) 0.0010(7) -0.0051(7)
B 0.046(4) 0.047(4) 0.051(4) -0.002(3) 0.006(3) -0.002(3)
O1 0.044(2) 0.037(2) 0.044(2) 0.0005(16) 0.0067(17) 0.0000(16)
N1 0.033(2) 0.041(3) 0.043(3) -0.003(2) 0.0052(19) -0.001(2)
N2 0.041(3) 0.046(3) 0.043(3) -0.001(2) 0.007(2) 0.003(2)
N3 0.051(3) 0.043(3) 0.050(3) -0.004(2) 0.007(2) 0.009(2)
N4 0.048(3) 0.041(3) 0.053(3) 0.001(2) -0.002(2) 0.007(2)
N5 0.048(3) 0.054(3) 0.053(3) 0.001(3) 0.008(2) -0.006(2)
N6 0.045(3) 0.044(3) 0.046(3) 0.000(2) -0.001(2) 0.000(2)
N7 0.054(3) 0.040(3) 0.048(3) 0.001(2) 0.010(2) -0.002(2)
C1 0.045(4) 0.068(4) 0.095(5) -0.004(4) 0.002(3) 0.007(3)
C2 0.043(3) 0.036(3) 0.048(3) -0.002(3) 0.003(3) 0.003(3)
C3 0.043(3) 0.037(3) 0.043(3) -0.008(3) 0.000(2) -0.004(3)
C4 0.062(4) 0.041(3) 0.075(4) 0.000(3) -0.004(3) -0.011(3)
C5 0.052(4) 0.052(4) 0.133(6) -0.004(4) 0.023(4) -0.016(3)
C6 0.044(3) 0.049(4) 0.064(4) -0.008(3) 0.003(3) -0.009(3)
C7 0.045(3) 0.040(3) 0.038(3) -0.006(3) 0.004(2) -0.004(3)
C8 0.039(3) 0.051(4) 0.055(4) -0.003(3) 0.006(3) -0.005(3)
C9 0.036(3) 0.039(3) 0.059(4) 0.000(3) 0.003(3) 0.001(3)
C10 0.038(3) 0.045(3) 0.052(3) 0.002(3) 0.009(3) -0.002(3)
C11 0.056(4) 0.047(4) 0.056(4) -0.005(3) 0.015(3) 0.005(3)
C12 0.043(4) 0.043(4) 0.086(5) -0.001(3) 0.000(3) 0.003(3)
C13 0.039(4) 0.070(5) 0.109(6) -0.001(4) 0.009(4) -0.003(3)
C14 0.052(4) 0.053(4) 0.084(5) -0.002(4) -0.021(4) 0.006(3)
C15 0.056(4) 0.047(4) 0.065(4) 0.000(3) -0.011(3) 0.007(3)
C16 0.096(6) 0.092(6) 0.067(5) -0.002(4) -0.001(4) 0.006(5)
C17 0.048(3) 0.058(4) 0.043(3) -0.002(3) -0.002(3) -0.005(3)
C18 0.045(3) 0.065(4) 0.058(4) -0.015(3) -0.005(3) -0.006(3)
C19 0.081(5) 0.122(7) 0.055(5) -0.007(4) 0.003(4) -0.020(5)
C20 0.052(4) 0.057(4) 0.078(5) -0.005(4) -0.003(3) -0.012(3)
C21 0.043(3) 0.048(4) 0.058(4) -0.002(3) -0.001(3) -0.001(3)
C22 0.070(4) 0.057(4) 0.083(5) 0.013(4) 0.001(4) -0.008(4)
C23 0.087(5) 0.048(4) 0.053(4) 0.009(3) 0.004(4) -0.009(3)
C24 0.108(6) 0.081(6) 0.048(4) 0.009(4) 0.020(4) -0.027(5)
C25 0.086(6) 0.091(6) 0.066(5) -0.017(4) 0.037(4) -0.024(5)
C26 0.057(4) 0.058(4) 0.071(4) -0.016(4) 0.017(3) -0.008(3)
C27 0.046(3) 0.039(3) 0.053(3) -0.006(3) 0.010(3) -0.008(3)
C28 0.055(4) 0.048(4) 0.049(3) -0.003(3) 0.016(3) 0.003(3)
C29 0.063(4) 0.052(4) 0.071(4) 0.003(3) 0.006(3) 0.008(3)
C30 0.080(5) 0.074(5) 0.070(5) 0.007(4) -0.002(4) 0.023(4)
C31 0.115(7) 0.050(4) 0.068(5) 0.006(4) 0.010(5) 0.009(5)
C32 0.108(6) 0.053(4) 0.074(5) -0.005(4) 0.024(5) -0.018(4)
C33 0.073(4) 0.052(4) 0.063(4) -0.006(3) 0.012(3) -0.011(3)
C34 0.053(4) 0.051(4) 0.048(3) -0.005(3) 0.005(3) 0.003(3)
C35 0.047(4) 0.072(4) 0.049(4) -0.004(3) 0.004(3) -0.004(3)
C36 0.053(4) 0.087(5) 0.081(5) -0.021(4) 0.012(4) -0.005(4)
C37 0.049(4) 0.114(7) 0.083(5) -0.030(5) 0.008(4) 0.017(4)
C38 0.094(6) 0.106(6) 0.091(6) 0.013(5) 0.010(5) 0.056(5)
C39 0.076(5) 0.077(5) 0.074(5) 0.014(4) 0.023(4) 0.024(4)
C40 0.041(3) 0.044(3) 0.061(4) -0.004(3) 0.005(3) 0.009(3)
C41 0.066(4) 0.067(4) 0.053(4) -0.009(3) 0.010(3) 0.007(4)
C42 0.073(5) 0.071(5) 0.084(5) -0.027(4) -0.008(4) 0.012(4)
C43 0.063(5) 0.053(4) 0.113(7) -0.028(5) -0.011(4) 0.005(4)
C44 0.062(4) 0.045(4) 0.102(6) 0.002(4) 0.007(4) 0.000(3)
C45 0.057(4) 0.050(4) 0.066(4) -0.001(3) -0.002(3) 0.002(3)
C46 0.054(4) 0.036(3) 0.060(4) 0.001(3) 0.008(3) 0.003(3)
C47 0.062(4) 0.056(4) 0.060(4) 0.002(3) 0.007(3) -0.007(3)
C48 0.101(6) 0.049(4) 0.057(4) 0.001(3) -0.005(4) -0.006(4)
C49 0.130(7) 0.044(4) 0.052(4) 0.005(3) 0.020(5) 0.018(4)
C50 0.089(5) 0.062(4) 0.072(5) 0.017(4) 0.032(4) 0.027(4)
C51 0.064(4) 0.060(4) 0.060(4) 0.006(3) 0.010(3) 0.009(3)
 
_geom_special_details
;
 All esds (except the esd in the dihedral angle between two l.s. planes)
 are estimated using the full covariance matrix.  The cell esds are taken
 into account individually in the estimation of esds in distances, angles
 and torsion angles; correlations between esds in cell parameters are only
 used when they are defined by crystal symmetry.  An approximate (isotropic)
 treatment of cell esds is used for estimating esds involving l.s. planes.
;
 
loop_
 _geom_bond_atom_site_label_1
 _geom_bond_atom_site_label_2
 _geom_bond_distance
 _geom_bond_site_symmetry_2
 _geom_bond_publ_flag
Ni1 Ni2 3.1877(10) . ?
Ni1 N1 1.861(4) . ?
Ni1 O1 1.889(3) . ?
Ni1 S2 2.1188(15) . ?
Ni1 S3 2.2242(15) . ?
Ni2 O1 2.012(3) . ?
Ni2 N7 2.064(4) . ?
Ni2 N6 2.087(4) . ?
Ni2 N4 2.091(4) . ?
Ni2 N2 2.128(4) . ?
Ni2 S3 2.5930(16) . ?
S1 C2 1.773(5) . ?
S1 C1 1.789(6) . ?
S2 C2 1.712(5) . ?
S3 C27 1.762(6) . ?
B C46 1.636(8) . ?
B C40 1.642(8) . ?
B C34 1.642(8) . ?
B C28 1.650(8) . ?
O1 C9 1.414(6) . ?
N1 C7 1.310(6) . ?
N1 C8 1.484(6) . ?
N2 C11 1.469(6) . ?
N2 C17 1.484(6) . ?
N2 C10 1.497(6) . ?
N3 C12 1.349(7) . ?
N3 N4 1.363(6) . ?
N3 C11 1.443(7) . ?
N4 C15 1.331(7) . ?
N5 C18 1.349(7) . ?
N5 N6 1.369(6) . ?
N5 C17 1.460(6) . ?
N6 C21 1.324(6) . ?
N7 C23 1.334(7) . ?
N7 C27 1.351(6) . ?
C2 C3 1.366(7) . ?
C3 C7 1.425(7) . ?
C3 C4 1.505(7) . ?
C4 C5 1.497(7) . ?
C5 C6 1.496(8) . ?
C6 C7 1.504(7) . ?
C8 C9 1.522(7) . ?
C9 C10 1.533(7) . ?
C12 C14 1.381(8) . ?
C12 C13 1.483(8) . ?
C14 C15 1.386(8) . ?
C15 C16 1.498(8) . ?
C18 C20 1.362(8) . ?
C18 C19 1.508(8) . ?
C20 C21 1.388(8) . ?
C21 C22 1.489(8) . ?
C23 C24 1.366(8) . ?
C24 C25 1.382(9) . ?
C25 C26 1.357(9) . ?
C26 C27 1.378(7) . ?
C28 C33 1.381(7) . ?
C28 C29 1.391(8) . ?
C29 C30 1.399(8) . ?
C30 C31 1.367(9) . ?
C31 C32 1.376(9) . ?
C32 C33 1.385(8) . ?
C34 C39 1.390(8) . ?
C34 C35 1.393(7) . ?
C35 C36 1.381(8) . ?
C36 C37 1.349(9) . ?
C37 C38 1.366(10) . ?
C38 C39 1.412(9) . ?
C40 C41 1.397(8) . ?
C40 C45 1.398(7) . ?
C41 C42 1.391(8) . ?
C42 C43 1.356(9) . ?
C43 C44 1.373(9) . ?
C44 C45 1.388(8) . ?
C46 C51 1.395(7) . ?
C46 C47 1.401(8) . ?
C47 C48 1.386(8) . ?
C48 C49 1.364(9) . ?
C49 C50 1.357(9) . ?
C50 C51 1.398(8) . ?
 
loop_
 _geom_angle_atom_site_label_1
 _geom_angle_atom_site_label_2
 _geom_angle_atom_site_label_3
 _geom_angle
 _geom_angle_site_symmetry_1
 _geom_angle_site_symmetry_3
 _geom_angle_publ_flag
N1 Ni1 O1 86.86(16) . . ?
N1 Ni1 S2 98.82(14) . . ?
O1 Ni1 S2 170.93(11) . . ?
N1 Ni1 S3 164.61(13) . . ?
O1 Ni1 S3 89.09(11) . . ?
S2 Ni1 S3 87.20(6) . . ?
O1 Ni2 N7 96.24(15) . . ?
O1 Ni2 N6 154.39(16) . . ?
N7 Ni2 N6 100.00(17) . . ?
O1 Ni2 N4 89.92(15) . . ?
N7 Ni2 N4 106.62(18) . . ?
N6 Ni2 N4 104.07(17) . . ?
O1 Ni2 N2 83.10(15) . . ?
N7 Ni2 N2 172.41(17) . . ?
N6 Ni2 N2 78.19(17) . . ?
N4 Ni2 N2 80.95(17) . . ?
O1 Ni2 S3 76.75(10) . . ?
N7 Ni2 S3 67.66(13) . . ?
N6 Ni2 S3 91.27(12) . . ?
N4 Ni2 S3 164.48(13) . . ?
N2 Ni2 S3 104.90(12) . . ?
C2 S1 C1 105.1(3) . . ?
C2 S2 Ni1 109.94(18) . . ?
C27 S3 Ni1 105.83(18) . . ?
C27 S3 Ni2 74.26(19) . . ?
Ni1 S3 Ni2 82.49(5) . . ?
C46 B C40 110.9(5) . . ?
C46 B C34 113.5(5) . . ?
C40 B C34 106.0(4) . . ?
C46 B C28 104.1(4) . . ?
C40 B C28 112.5(5) . . ?
C34 B C28 110.0(5) . . ?
C9 O1 Ni1 107.3(3) . . ?
C9 O1 Ni2 110.6(3) . . ?
Ni1 O1 Ni2 109.59(16) . . ?
C7 N1 C8 117.1(4) . . ?
C7 N1 Ni1 131.3(4) . . ?
C8 N1 Ni1 111.6(3) . . ?
C11 N2 C17 111.0(4) . . ?
C11 N2 C10 113.1(4) . . ?
C17 N2 C10 113.8(4) . . ?
C11 N2 Ni2 105.3(3) . . ?
C17 N2 Ni2 105.5(3) . . ?
C10 N2 Ni2 107.5(3) . . ?
C12 N3 N4 112.2(5) . . ?
C12 N3 C11 129.6(5) . . ?
N4 N3 C11 118.1(4) . . ?
C15 N4 N3 105.6(5) . . ?
C15 N4 Ni2 137.1(4) . . ?
N3 N4 Ni2 109.7(3) . . ?
C18 N5 N6 111.2(5) . . ?
C18 N5 C17 129.9(5) . . ?
N6 N5 C17 118.9(4) . . ?
C21 N6 N5 105.6(4) . . ?
C21 N6 Ni2 142.9(4) . . ?
N5 N6 Ni2 110.8(3) . . ?
C23 N7 C27 118.3(5) . . ?
C23 N7 Ni2 138.6(4) . . ?
C27 N7 Ni2 103.1(3) . . ?
C3 C2 S2 127.8(4) . . ?
C3 C2 S1 115.2(4) . . ?
S2 C2 S1 116.9(3) . . ?
C2 C3 C7 125.5(5) . . ?
C2 C3 C4 124.7(5) . . ?
C7 C3 C4 109.8(5) . . ?
C5 C4 C3 106.0(5) . . ?
C6 C5 C4 108.6(5) . . ?
C5 C6 C7 106.4(5) . . ?
N1 C7 C3 126.5(5) . . ?
N1 C7 C6 124.2(5) . . ?
C3 C7 C6 109.2(5) . . ?
N1 C8 C9 107.5(4) . . ?
O1 C9 C8 107.5(4) . . ?
O1 C9 C10 109.5(4) . . ?
C8 C9 C10 112.1(4) . . ?
N2 C10 C9 109.8(4) . . ?
N3 C11 N2 108.7(4) . . ?
N3 C12 C14 105.0(5) . . ?
N3 C12 C13 123.5(6) . . ?
C14 C12 C13 131.6(6) . . ?
C12 C14 C15 107.5(5) . . ?
N4 C15 C14 109.7(6) . . ?
N4 C15 C16 123.3(6) . . ?
C14 C15 C16 126.9(6) . . ?
N5 C17 N2 108.1(4) . . ?
N5 C18 C20 106.1(5) . . ?
N5 C18 C19 122.4(6) . . ?
C20 C18 C19 131.4(6) . . ?
C18 C20 C21 107.1(5) . . ?
N6 C21 C20 110.0(5) . . ?
N6 C21 C22 121.6(5) . . ?
C20 C21 C22 128.4(6) . . ?
N7 C23 C24 123.2(6) . . ?
C23 C24 C25 118.0(6) . . ?
C26 C25 C24 119.6(6) . . ?
C25 C26 C27 119.8(6) . . ?
N7 C27 C26 121.0(5) . . ?
N7 C27 S3 114.6(4) . . ?
C26 C27 S3 124.2(5) . . ?
C33 C28 C29 114.7(6) . . ?
C33 C28 B 120.0(5) . . ?
C29 C28 B 125.0(5) . . ?
C28 C29 C30 122.1(6) . . ?
C31 C30 C29 121.0(7) . . ?
C30 C31 C32 118.4(7) . . ?
C31 C32 C33 119.7(7) . . ?
C28 C33 C32 124.1(7) . . ?
C39 C34 C35 113.8(5) . . ?
C39 C34 B 120.6(5) . . ?
C35 C34 B 125.4(5) . . ?
C36 C35 C34 124.2(6) . . ?
C37 C36 C35 119.7(7) . . ?
C36 C37 C38 120.0(7) . . ?
C37 C38 C39 119.4(7) . . ?
C34 C39 C38 122.6(6) . . ?
C41 C40 C45 115.1(6) . . ?
C41 C40 B 121.0(5) . . ?
C45 C40 B 123.9(5) . . ?
C42 C41 C40 122.3(6) . . ?
C43 C42 C41 120.9(7) . . ?
C42 C43 C44 118.8(7) . . ?
C43 C44 C45 120.6(7) . . ?
C44 C45 C40 122.3(6) . . ?
C51 C46 C47 115.7(5) . . ?
C51 C46 B 119.0(5) . . ?
C47 C46 B 125.1(5) . . ?
C48 C47 C46 121.7(6) . . ?
C49 C48 C47 120.9(7) . . ?
C50 C49 C48 119.3(6) . . ?
C49 C50 C51 120.6(7) . . ?
C46 C51 C50 121.8(6) . . ?
 
loop_
 _geom_torsion_atom_site_label_1
 _geom_torsion_atom_site_label_2
 _geom_torsion_atom_site_label_3
 _geom_torsion_atom_site_label_4
 _geom_torsion
 _geom_torsion_site_symmetry_1
 _geom_torsion_site_symmetry_2
 _geom_torsion_site_symmetry_3
 _geom_torsion_site_symmetry_4
 _geom_torsion_publ_flag
N1 Ni1 S2 C2 2.7(2) . . . . ?
O1 Ni1 S2 C2 -125.6(7) . . . . ?
S3 Ni1 S2 C2 168.4(2) . . . . ?
N1 Ni1 S3 C27 -136.1(5) . . . . ?
O1 Ni1 S3 C27 -61.5(2) . . . . ?
S2 Ni1 S3 C27 110.3(2) . . . . ?
N1 Ni1 S3 Ni2 -64.9(5) . . . . ?
O1 Ni1 S3 Ni2 9.76(10) . . . . ?
S2 Ni1 S3 Ni2 -178.51(6) . . . . ?
O1 Ni2 S3 C27 99.4(2) . . . . ?
N7 Ni2 S3 C27 -3.1(2) . . . . ?
N6 Ni2 S3 C27 -103.4(2) . . . . ?
N4 Ni2 S3 C27 68.0(5) . . . . ?
N2 Ni2 S3 C27 178.5(2) . . . . ?
O1 Ni2 S3 Ni1 -9.41(10) . . . . ?
N7 Ni2 S3 Ni1 -111.97(14) . . . . ?
N6 Ni2 S3 Ni1 147.73(13) . . . . ?
N4 Ni2 S3 Ni1 -40.9(5) . . . . ?
N2 Ni2 S3 Ni1 69.62(13) . . . . ?
N1 Ni1 O1 C9 31.6(3) . . . . ?
S2 Ni1 O1 C9 160.7(6) . . . . ?
S3 Ni1 O1 C9 -133.5(3) . . . . ?
N1 Ni1 O1 Ni2 151.85(18) . . . . ?
S2 Ni1 O1 Ni2 -79.1(7) . . . . ?
S3 Ni1 O1 Ni2 -13.30(14) . . . . ?
N7 Ni2 O1 C9 -164.9(3) . . . . ?
N6 Ni2 O1 C9 65.9(5) . . . . ?
N4 Ni2 O1 C9 -58.2(3) . . . . ?
N2 Ni2 O1 C9 22.7(3) . . . . ?
S3 Ni2 O1 C9 129.9(3) . . . . ?
N7 Ni2 O1 Ni1 76.95(19) . . . . ?
N6 Ni2 O1 Ni1 -52.3(4) . . . . ?
N4 Ni2 O1 Ni1 -176.33(18) . . . . ?
N2 Ni2 O1 Ni1 -95.44(18) . . . . ?
S3 Ni2 O1 Ni1 11.69(12) . . . . ?
O1 Ni1 N1 C7 169.8(5) . . . . ?
S2 Ni1 N1 C7 -3.1(5) . . . . ?
S3 Ni1 N1 C7 -115.3(6) . . . . ?
O1 Ni1 N1 C8 -8.0(3) . . . . ?
S2 Ni1 N1 C8 179.1(3) . . . . ?
S3 Ni1 N1 C8 67.0(7) . . . . ?
O1 Ni2 N2 C11 -117.1(3) . . . . ?
N7 Ni2 N2 C11 157.4(12) . . . . ?
N6 Ni2 N2 C11 80.5(3) . . . . ?
N4 Ni2 N2 C11 -26.0(3) . . . . ?
S3 Ni2 N2 C11 168.7(3) . . . . ?
O1 Ni2 N2 C17 125.5(3) . . . . ?
N7 Ni2 N2 C17 40.0(14) . . . . ?
N6 Ni2 N2 C17 -36.9(3) . . . . ?
N4 Ni2 N2 C17 -143.5(3) . . . . ?
S3 Ni2 N2 C17 51.2(3) . . . . ?
O1 Ni2 N2 C10 3.8(3) . . . . ?
N7 Ni2 N2 C10 -81.7(13) . . . . ?
N6 Ni2 N2 C10 -158.7(3) . . . . ?
N4 Ni2 N2 C10 94.8(3) . . . . ?
S3 Ni2 N2 C10 -70.5(3) . . . . ?
C12 N3 N4 C15 -0.8(6) . . . . ?
C11 N3 N4 C15 175.2(5) . . . . ?
C12 N3 N4 Ni2 -156.0(4) . . . . ?
C11 N3 N4 Ni2 20.0(5) . . . . ?
O1 Ni2 N4 C15 -55.9(6) . . . . ?
N7 Ni2 N4 C15 40.6(6) . . . . ?
N6 Ni2 N4 C15 145.8(6) . . . . ?
N2 Ni2 N4 C15 -138.9(6) . . . . ?
S3 Ni2 N4 C15 -25.3(9) . . . . ?
O1 Ni2 N4 N3 87.7(3) . . . . ?
N7 Ni2 N4 N3 -175.9(3) . . . . ?
N6 Ni2 N4 N3 -70.7(3) . . . . ?
N2 Ni2 N4 N3 4.6(3) . . . . ?
S3 Ni2 N4 N3 118.2(5) . . . . ?
C18 N5 N6 C21 -0.3(6) . . . . ?
C17 N5 N6 C21 -178.6(4) . . . . ?
C18 N5 N6 Ni2 172.6(4) . . . . ?
C17 N5 N6 Ni2 -5.7(5) . . . . ?
O1 Ni2 N6 C21 148.7(5) . . . . ?
N7 Ni2 N6 C21 20.1(6) . . . . ?
N4 Ni2 N6 C21 -90.0(6) . . . . ?
N2 Ni2 N6 C21 -167.4(6) . . . . ?
S3 Ni2 N6 C21 87.7(6) . . . . ?
O1 Ni2 N6 N5 -19.9(6) . . . . ?
N7 Ni2 N6 N5 -148.4(3) . . . . ?
N4 Ni2 N6 N5 101.5(3) . . . . ?
N2 Ni2 N6 N5 24.1(3) . . . . ?
S3 Ni2 N6 N5 -80.9(3) . . . . ?
O1 Ni2 N7 C23 109.5(6) . . . . ?
N6 Ni2 N7 C23 -90.3(6) . . . . ?
N4 Ni2 N7 C23 17.8(6) . . . . ?
N2 Ni2 N7 C23 -165.8(11) . . . . ?
S3 Ni2 N7 C23 -177.6(6) . . . . ?
O1 Ni2 N7 C27 -68.9(3) . . . . ?
N6 Ni2 N7 C27 91.3(3) . . . . ?
N4 Ni2 N7 C27 -160.7(3) . . . . ?
N2 Ni2 N7 C27 15.8(15) . . . . ?
S3 Ni2 N7 C27 4.0(3) . . . . ?
Ni1 S2 C2 C3 -2.9(6) . . . . ?
Ni1 S2 C2 S1 180.0(2) . . . . ?
C1 S1 C2 C3 -177.4(4) . . . . ?
C1 S1 C2 S2 0.0(4) . . . . ?
S2 C2 C3 C7 2.3(8) . . . . ?
S1 C2 C3 C7 179.4(4) . . . . ?
S2 C2 C3 C4 -179.2(4) . . . . ?
S1 C2 C3 C4 -2.1(7) . . . . ?
C2 C3 C4 C5 179.1(5) . . . . ?
C7 C3 C4 C5 -2.2(7) . . . . ?
C3 C4 C5 C6 3.0(7) . . . . ?
C4 C5 C6 C7 -2.7(7) . . . . ?
C8 N1 C7 C3 -179.6(5) . . . . ?
Ni1 N1 C7 C3 2.8(8) . . . . ?
C8 N1 C7 C6 -0.7(7) . . . . ?
Ni1 N1 C7 C6 -178.3(4) . . . . ?
C2 C3 C7 N1 -1.8(9) . . . . ?
C4 C3 C7 N1 179.5(5) . . . . ?
C2 C3 C7 C6 179.2(5) . . . . ?
C4 C3 C7 C6 0.5(6) . . . . ?
C5 C6 C7 N1 -177.7(5) . . . . ?
C5 C6 C7 C3 1.4(6) . . . . ?
C7 N1 C8 C9 166.3(4) . . . . ?
Ni1 N1 C8 C9 -15.6(5) . . . . ?
Ni1 O1 C9 C8 -46.8(4) . . . . ?
Ni2 O1 C9 C8 -166.3(3) . . . . ?
Ni1 O1 C9 C10 75.2(4) . . . . ?
Ni2 O1 C9 C10 -44.3(5) . . . . ?
N1 C8 C9 O1 40.4(5) . . . . ?
N1 C8 C9 C10 -79.9(5) . . . . ?
C11 N2 C10 C9 88.3(5) . . . . ?
C17 N2 C10 C9 -143.8(4) . . . . ?
Ni2 N2 C10 C9 -27.4(5) . . . . ?
O1 C9 C10 N2 47.8(5) . . . . ?
C8 C9 C10 N2 167.0(4) . . . . ?
C12 N3 C11 N2 131.2(5) . . . . ?
N4 N3 C11 N2 -44.0(6) . . . . ?
C17 N2 C11 N3 156.2(4) . . . . ?
C10 N2 C11 N3 -74.5(5) . . . . ?
Ni2 N2 C11 N3 42.6(5) . . . . ?
N4 N3 C12 C14 -0.3(6) . . . . ?
C11 N3 C12 C14 -175.7(5) . . . . ?
N4 N3 C12 C13 179.8(5) . . . . ?
C11 N3 C12 C13 4.3(9) . . . . ?
N3 C12 C14 C15 1.2(7) . . . . ?
C13 C12 C14 C15 -178.9(6) . . . . ?
N3 N4 C15 C14 1.6(6) . . . . ?
Ni2 N4 C15 C14 146.1(5) . . . . ?
N3 N4 C15 C16 -179.2(5) . . . . ?
Ni2 N4 C15 C16 -34.8(9) . . . . ?
C12 C14 C15 N4 -1.8(7) . . . . ?
C12 C14 C15 C16 179.1(6) . . . . ?
C18 N5 C17 N2 155.8(5) . . . . ?
N6 N5 C17 N2 -26.3(6) . . . . ?
C11 N2 C17 N5 -70.2(5) . . . . ?
C10 N2 C17 N5 160.9(4) . . . . ?
Ni2 N2 C17 N5 43.3(5) . . . . ?
N6 N5 C18 C20 0.3(6) . . . . ?
C17 N5 C18 C20 178.3(5) . . . . ?
N6 N5 C18 C19 -176.8(5) . . . . ?
C17 N5 C18 C19 1.2(9) . . . . ?
N5 C18 C20 C21 -0.2(7) . . . . ?
C19 C18 C20 C21 176.5(6) . . . . ?
N5 N6 C21 C20 0.1(6) . . . . ?
Ni2 N6 C21 C20 -168.8(4) . . . . ?
N5 N6 C21 C22 179.7(5) . . . . ?
Ni2 N6 C21 C22 10.8(9) . . . . ?
C18 C20 C21 N6 0.0(7) . . . . ?
C18 C20 C21 C22 -179.5(6) . . . . ?
C27 N7 C23 C24 2.2(9) . . . . ?
Ni2 N7 C23 C24 -176.0(5) . . . . ?
N7 C23 C24 C25 -1.6(10) . . . . ?
C23 C24 C25 C26 -0.2(10) . . . . ?
C24 C25 C26 C27 1.3(10) . . . . ?
C23 N7 C27 C26 -1.0(8) . . . . ?
Ni2 N7 C27 C26 177.8(4) . . . . ?
C23 N7 C27 S3 175.2(4) . . . . ?
Ni2 N7 C27 S3 -6.0(4) . . . . ?
C25 C26 C27 N7 -0.7(9) . . . . ?
C25 C26 C27 S3 -176.5(5) . . . . ?
Ni1 S3 C27 N7 82.1(4) . . . . ?
Ni2 S3 C27 N7 4.9(3) . . . . ?
Ni1 S3 C27 C26 -101.9(5) . . . . ?
Ni2 S3 C27 C26 -179.1(5) . . . . ?
C46 B C28 C33 -72.6(6) . . . . ?
C40 B C28 C33 167.3(5) . . . . ?
C34 B C28 C33 49.3(7) . . . . ?
C46 B C28 C29 100.7(6) . . . . ?
C40 B C28 C29 -19.5(8) . . . . ?
C34 B C28 C29 -137.4(6) . . . . ?
C33 C28 C29 C30 -1.0(9) . . . . ?
B C28 C29 C30 -174.5(6) . . . . ?
C28 C29 C30 C31 0.2(10) . . . . ?
C29 C30 C31 C32 0.1(10) . . . . ?
C30 C31 C32 C33 0.4(10) . . . . ?
C29 C28 C33 C32 1.5(9) . . . . ?
B C28 C33 C32 175.5(6) . . . . ?
C31 C32 C33 C28 -1.3(10) . . . . ?
C46 B C34 C39 -48.6(8) . . . . ?
C40 B C34 C39 73.3(7) . . . . ?
C28 B C34 C39 -164.8(5) . . . . ?
C46 B C34 C35 136.0(6) . . . . ?
C40 B C34 C35 -102.0(6) . . . . ?
C28 B C34 C35 19.9(8) . . . . ?
C39 C34 C35 C36 3.6(9) . . . . ?
B C34 C35 C36 179.2(6) . . . . ?
C34 C35 C36 C37 -0.1(10) . . . . ?
C35 C36 C37 C38 -2.4(11) . . . . ?
C36 C37 C38 C39 1.2(12) . . . . ?
C35 C34 C39 C38 -4.8(10) . . . . ?
B C34 C39 C38 179.4(6) . . . . ?
C37 C38 C39 C34 2.6(12) . . . . ?
C46 B C40 C41 -163.6(5) . . . . ?
C34 B C40 C41 72.8(6) . . . . ?
C28 B C40 C41 -47.5(7) . . . . ?
C46 B C40 C45 18.8(7) . . . . ?
C34 B C40 C45 -104.9(6) . . . . ?
C28 B C40 C45 134.9(5) . . . . ?
C45 C40 C41 C42 -0.7(8) . . . . ?
B C40 C41 C42 -178.5(5) . . . . ?
C40 C41 C42 C43 0.6(10) . . . . ?
C41 C42 C43 C44 -0.1(10) . . . . ?
C42 C43 C44 C45 -0.2(10) . . . . ?
C43 C44 C45 C40 0.0(9) . . . . ?
C41 C40 C45 C44 0.4(8) . . . . ?
B C40 C45 C44 178.1(5) . . . . ?
C40 B C46 C51 49.5(7) . . . . ?
C34 B C46 C51 168.7(5) . . . . ?
C28 B C46 C51 -71.7(6) . . . . ?
C40 B C46 C47 -135.6(6) . . . . ?
C34 B C46 C47 -16.3(8) . . . . ?
C28 B C46 C47 103.2(6) . . . . ?
C51 C46 C47 C48 -2.5(8) . . . . ?
B C46 C47 C48 -177.6(5) . . . . ?
C46 C47 C48 C49 2.4(9) . . . . ?
C47 C48 C49 C50 -1.0(10) . . . . ?
C48 C49 C50 C51 -0.1(10) . . . . ?
C47 C46 C51 C50 1.3(9) . . . . ?
B C46 C51 C50 176.8(5) . . . . ?
C49 C50 C51 C46 -0.1(10) . . . . ?

 Least-squares planes (x,y,z in crystal coordinates) and deviations from them
 (* indicates atom used to define plane)
 
  0.4618 (0.0156) x + 3.7171 (0.0221) y + 24.5868 (0.0094) z = 1.8790 (0.0039)
 
 *   -0.0763 (0.0012)  S1
 *    0.0666 (0.0011)  N1
 *   -0.0850 (0.0013)  O1
 *    0.0948 (0.0015)  S2
      0.1202 (0.0019)  Ni1
     -0.0372 (0.0054)  C2
     -0.0630 (0.0061)  C3
     -0.0280 (0.0069)  C7
      0.0952 (0.0074)  C8
      0.5469 (0.0063)  C9
     -0.6495 (0.0081)  C27
     -0.7431 (0.0075)  N7
      0.7684 (0.0043)  Ni2
 
 Rms deviation of fitted atoms =   0.0814
 
 
  0.3423 (0.0156) x + 3.4387 (0.0205) y + 24.6745 (0.0084) z = 1.8721 (0.0040)
 
 Angle to previous plane (with approximate esd) =  1.07 ( 0.07 )
 
 *   -0.0771 (0.0012)  S1
 *    0.0633 (0.0011)  N1
 *   -0.1274 (0.0017)  O1
 *    0.0585 (0.0014)  S2
 *    0.0826 (0.0013)  Ni1
     -0.0431 (0.0054)  C2
     -0.0476 (0.0061)  C3
     -0.0120 (0.0070)  C7
      0.0971 (0.0074)  C8
      0.5248 (0.0062)  C9
     -0.7446 (0.0076)  C27
     -0.8408 (0.0068)  N7
      0.6934 (0.0034)  Ni2
 
 Rms deviation of fitted atoms =   0.0853
 
 
  6.9493 (0.0222) x + 7.7650 (0.0911) y + 14.6231 (0.0476) z = 3.0576 (0.0219)
 
 Angle to previous plane (with approximate esd) = 46.51 ( 0.17 )
 
 *   -0.8638 (0.0056)  O1
 *    0.8654 (0.0031)  N2
 *   -0.5938 (0.0057)  N4
 *    0.5922 (0.0028)  N7
      0.6471 (0.0022)  Ni2
      0.3951 (0.0248)  S2
     -0.2546 (0.0153)  Ni1
     -1.5601 (0.0188)  N1
     -2.2061 (0.0141)  C8
     -1.3240 (0.0089)  C9
     -0.1244 (0.0096)  C10
      0.6047 (0.0097)  C11
     -0.5318 (0.0106)  N3
     -1.7729 (0.0117)  C15
      0.2479 (0.0107)  C23
      1.0234 (0.0096)  C27
 
 Rms deviation of fitted atoms =   0.7414
 
 
  6.8298 (0.0256) x + 7.7334 (0.1091) y + 14.9926 (0.0511) z = 3.1949 (0.0262)
 
 Angle to previous plane (with approximate esd) =  1.07 ( 0.57 )
 
 *   -0.9923 (0.0068)  O1
 *    0.7716 (0.0034)  N2
 *   -0.7141 (0.0070)  N4
 *    0.4207 (0.0029)  N7
 *    0.5141 (0.0018)  Ni2
      0.2451 (0.0297)  S2
     -0.3903 (0.0183)  Ni1
     -1.6737 (0.0224)  N1
     -2.3060 (0.0165)  C8
     -1.4274 (0.0100)  C9
     -0.2102 (0.0107)  C10
      0.5220 (0.0104)  C11
     -0.6268 (0.0120)  N3
     -1.8993 (0.0133)  C15
      0.0582 (0.0111)  C23
      0.8453 (0.0104)  C27
 
 Rms deviation of fitted atoms =   0.7115
 
 
 - 6.6605 (0.0147) x + 13.1144 (0.0338) y - 8.0501 (0.0385) z = 2.4159 (0.0129)
 
 Angle to previous plane (with approximate esd) = 66.36 ( 0.27 )
 
 *   -0.0451 (0.0011)  N2
 *    0.0012 (0.0001)  N6
 *   -0.0463 (0.0011)  N7
 *    0.0902 (0.0021)  Ni2
     -0.4691 (0.0066)  O1
     -0.1542 (0.0088)  C9
     -0.5518 (0.0078)  C10
      1.3175 (0.0064)  C11
      2.2468 (0.0057)  N3
      2.0621 (0.0051)  N4
      0.7675 (0.0082)  C23
     -1.3756 (0.0063)  C27
 
 Rms deviation of fitted atoms =   0.0555
 
_diffrn_measured_fraction_theta_max    0.999
_diffrn_reflns_theta_full              24.98
_diffrn_measured_fraction_theta_full   0.999
_refine_diff_density_max    0.512
_refine_diff_density_min   -0.462
_refine_diff_density_rms    0.073
